# Supplementary material for: DNA methylation age of human tissues and cell types
Source: PubMed Central journal article supplement (PMC4015143; doi:10.1186/gb-2013-14-10-r115), 2013-10-21

**A AllBlood err=2.8 cor=0.97, p<1e-200**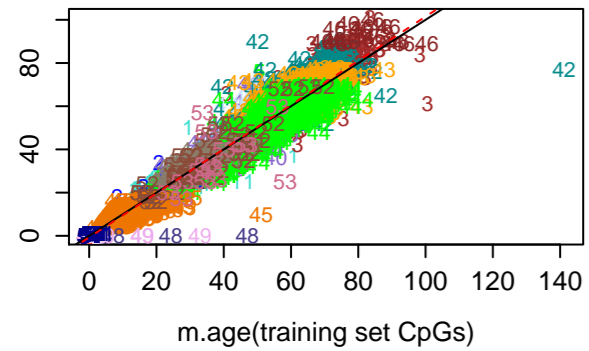**B Dat1 Train err=2.8 cor=0.96, p<1e-200**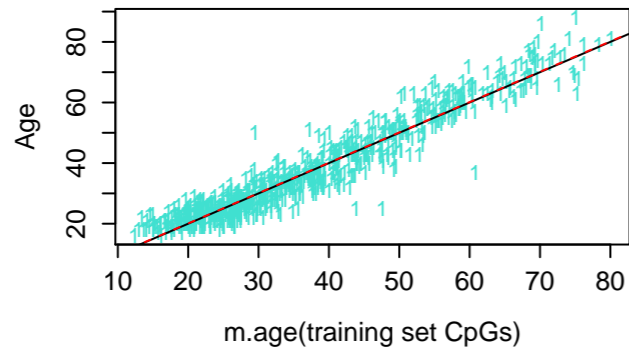**C Dat2 Train err=2.5 cor=0.93, p=9.1e-42**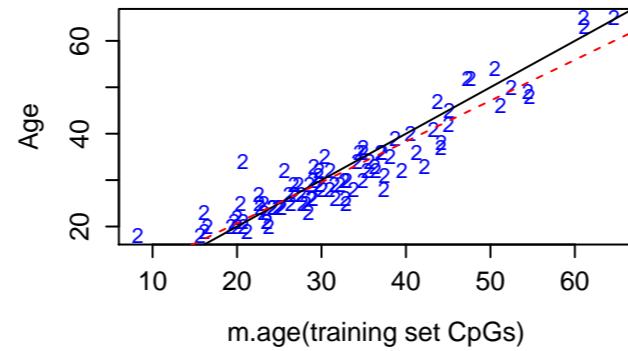**D Dat3 Train err=3.9 cor=0.91, p<1e-200**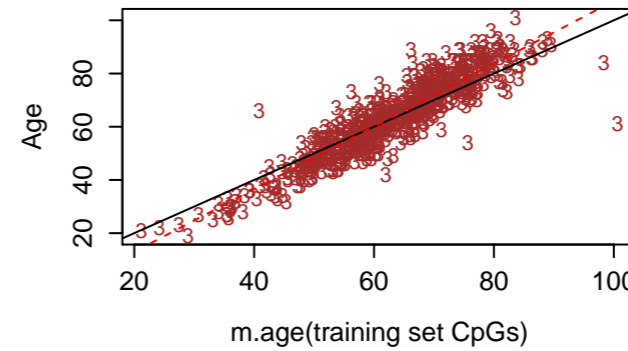**E Dat4 Train err=0.5 cor=0.96, p=2e-40**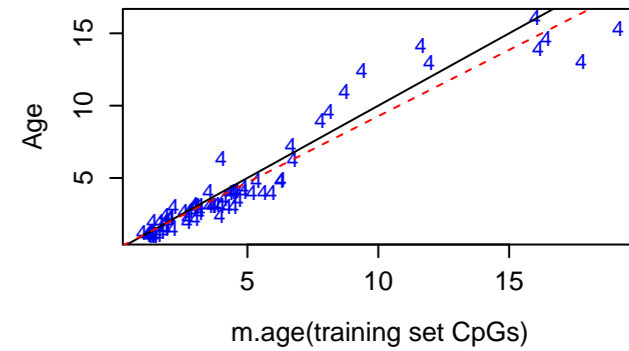**F Dat5 Train err=2.4 cor=0.96, p=5.9e-26**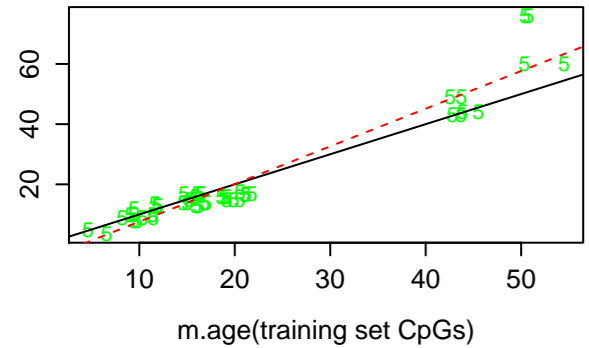**G Dat40 Test err=3.5 cor=0.81, p=1.1e-45**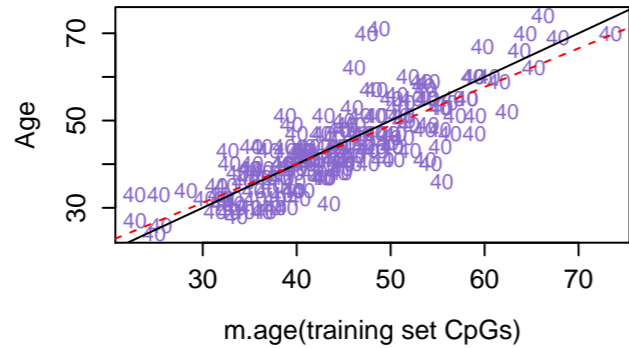**H Dat41 Test err=8.1 cor=0.69, p=2e-14**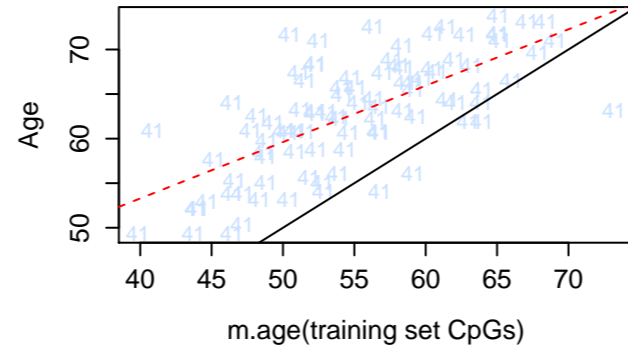**I Dat42 Test err=5.1 cor=0.63, p=2.2e-30**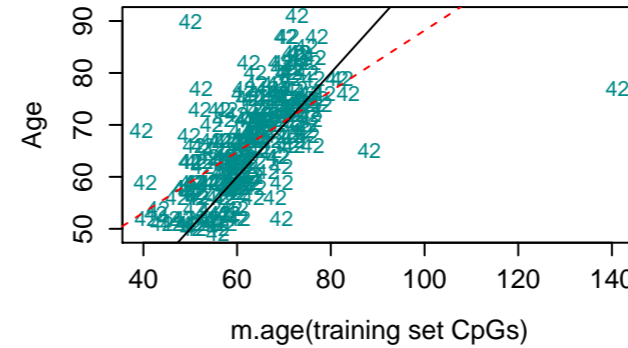**J Dat43 Test err=3.9 cor=0.66, p=5.1e-35**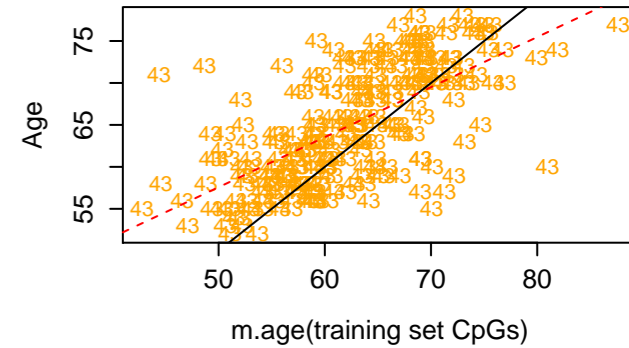**K Dat44 Test err=3.8 cor=0.89, p<1e-200**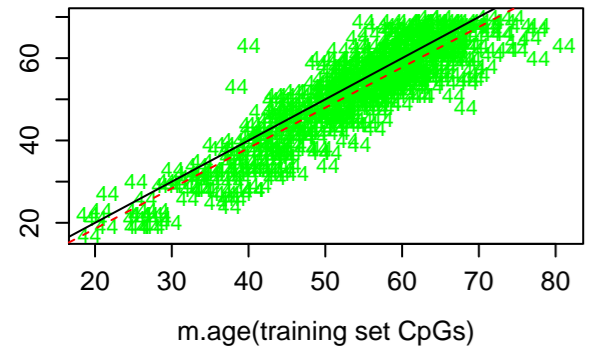**L Dat45 Test err=1.7 cor=0.7, p=4.1e-58**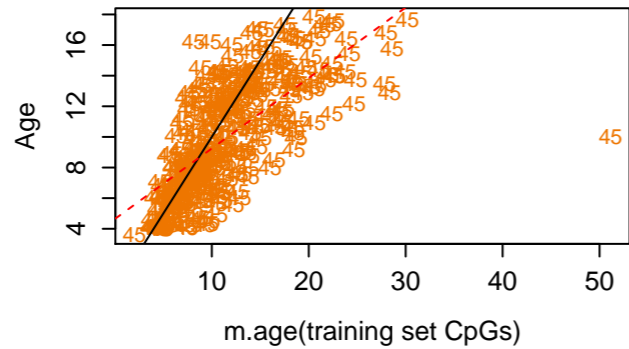**M Dat46 Test err=1 cor=0.99, p=3.2e-32**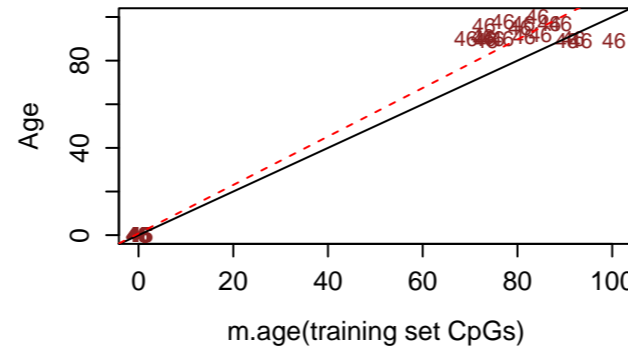**N Dat47 Test err=2.9 cor=0.73, p=1.5e-16**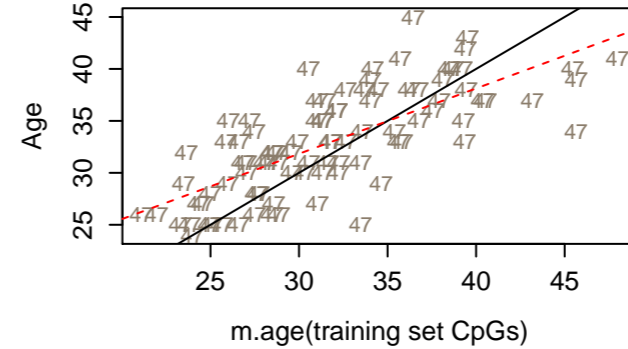**O Dat49 Test err=0.15 cor=-0.038, p=0.73**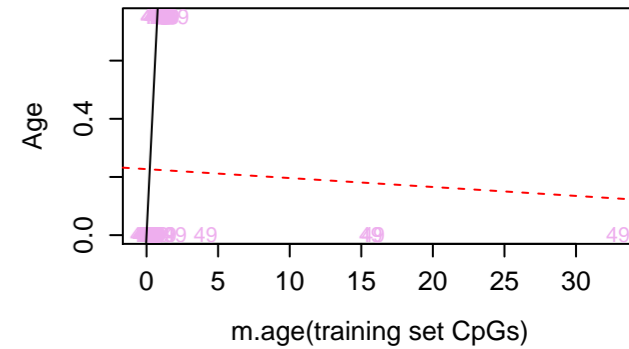**P Dat51 Test err=0.27 cor=0.78, p=6.4e-11**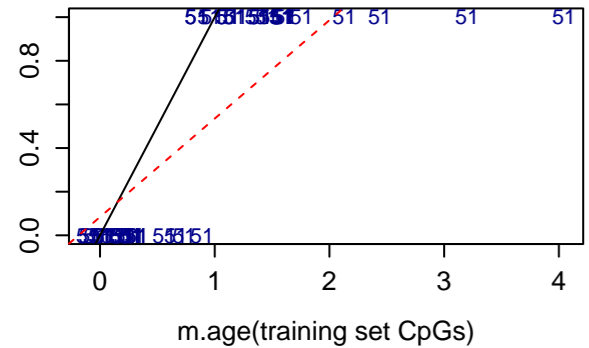**Q Dat52 Test err=3.7 cor=0.9, p=6.2e-19**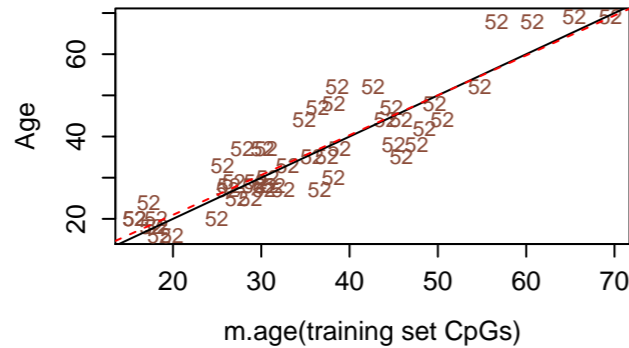**R Dat53 Test err=4.4 cor=0.46, p=0.073**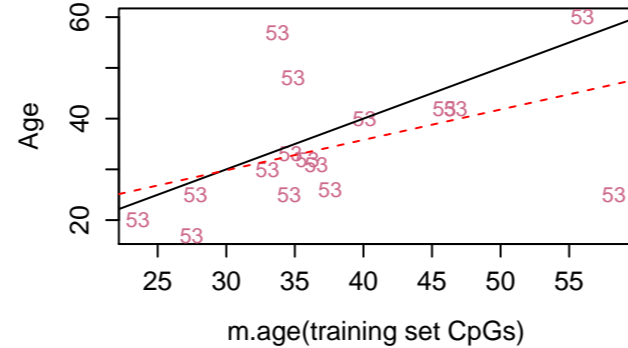**S Cord Blood Data**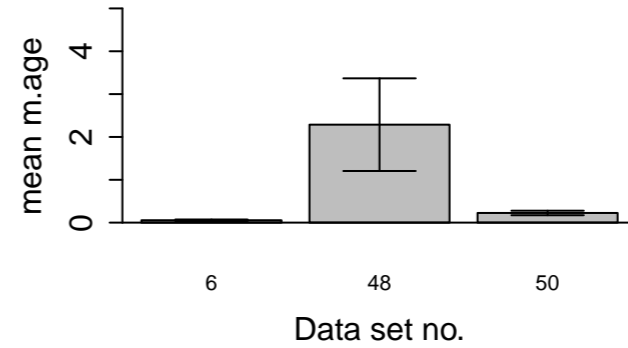**T GSE35069 blood Coef.Var= 0.32 err= 1.9 p = 0.57**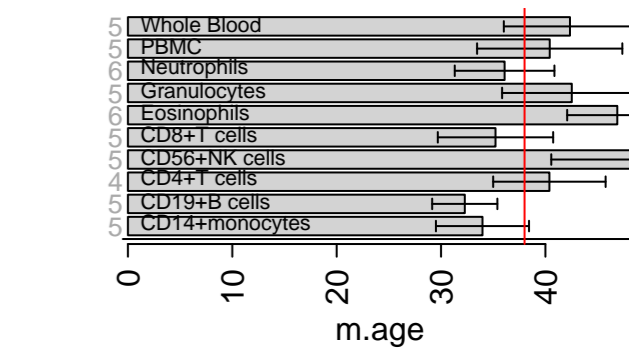

Supplement: gb-2013-14-10-r115-S4.pdf [file gb-2013-14-10-r115-S4.pdf]
