# Supplementary material for: DNA methylation age of human tissues and cell types
Source: PubMed Central journal article supplement (PMC4015143; doi:10.1186/gb-2013-14-10-r115), 2013-10-21

**Additional File 7:  
Ingenuity Pathway Analysis for the CpGs that are  
used for calculating DNA methylation age.**

**Horvath S. DNA Methylation age of  
human tissues and cell types.**

## Top Bio Functions

### Diseases and Disorders

| Name                        | p-value             | # Molecules |
|-----------------------------|---------------------|-------------|
| Cancer                      | 9.20E-05 - 3.17E-02 | 109         |
| Developmental Disorder      | 2.55E-04 - 3.17E-02 | 28          |
| Endocrine System Disorders  | 2.55E-04 - 3.17E-02 | 22          |
| Hereditary Disorder         | 2.55E-04 - 3.17E-02 | 50          |
| Reproductive System Disease | 2.55E-04 - 3.12E-02 | 37          |

### Molecular and Cellular Functions

| Name                              | p-value             | # Molecules |
|-----------------------------------|---------------------|-------------|
| Cell Death and Survival           | 1.07E-07 - 3.17E-02 | 74          |
| Cellular Growth and Proliferation | 3.65E-05 - 3.17E-02 | 71          |
| Lipid Metabolism                  | 2.13E-04 - 3.17E-02 | 35          |
| Molecular Transport               | 2.13E-04 - 3.17E-02 | 35          |
| Small Molecule Biochemistry       | 2.13E-04 - 3.17E-02 | 44          |

### Physiological System Development and Function

| Name                                          | p-value             | # Molecules |
|-----------------------------------------------|---------------------|-------------|
| Immune Cell Trafficking                       | 2.58E-04 - 2.64E-02 | 28          |
| Hematological System Development and Function | 2.90E-04 - 3.17E-02 | 57          |
| Organismal Development                        | 4.61E-04 - 3.17E-02 | 56          |
| Embryonic Development                         | 6.06E-04 - 3.17E-02 | 36          |
| Tissue Development                            | 6.06E-04 - 3.17E-02 | 27          |

## Top Canonical Pathways

| Name                                         | p-value  | Ratio            |
|----------------------------------------------|----------|------------------|
| Sertoli Cell-Sertoli Cell Junction Signaling | 7.71E-03 | 8/187<br>(0.043) |
| Death Receptor Signaling                     | 1.38E-02 | 4/63<br>(0.063)  |
| Dopamine-DARPP32 Feedback in cAMP Signaling  | 1.6E-02  | 7/167<br>(0.042) |
| D-mannose Degradation                        | 1.6E-02  | 1/1 (1)          |
| Circadian Rhythm Signaling                   | 1.68E-02 | 3/36<br>(0.083)  |

## Top Upstream Regulators

| Upstream Regulator | p-value of overlap | Predicted Activation State |
|--------------------|--------------------|----------------------------|
| RHOA               | 2.83E-04           |                            |
| PHC1               | 7.00E-04           |                            |
| TNF                | 9.73E-04           |                            |
| ZFYVE9             | 1.39E-03           |                            |
| PI3K (family)      | 2.43E-03           |                            |

## Top Networks

| ID | Associated Network Functions                                                                      | Score |
|----|---------------------------------------------------------------------------------------------------|-------|
| 1  | Hematological System Development and Function, Tissue Morphology, Cell Death and Survival         | 37    |
| 2  | Cellular Growth and Proliferation, Cell Signaling, Developmental Disorder                         | 37    |
| 3  | Hepatocellular Peroxisome Proliferation, Organismal Functions, Cellular Assembly and Organization | 30    |
| 4  | Cellular Development, Hematological System Development and Function, Hematopoiesis                | 19    |
| 5  | Cardiovascular Disease, Hematological Disease, Cell-To-Cell Signaling and Interaction             | 19    |

# Network 1 p=E-37

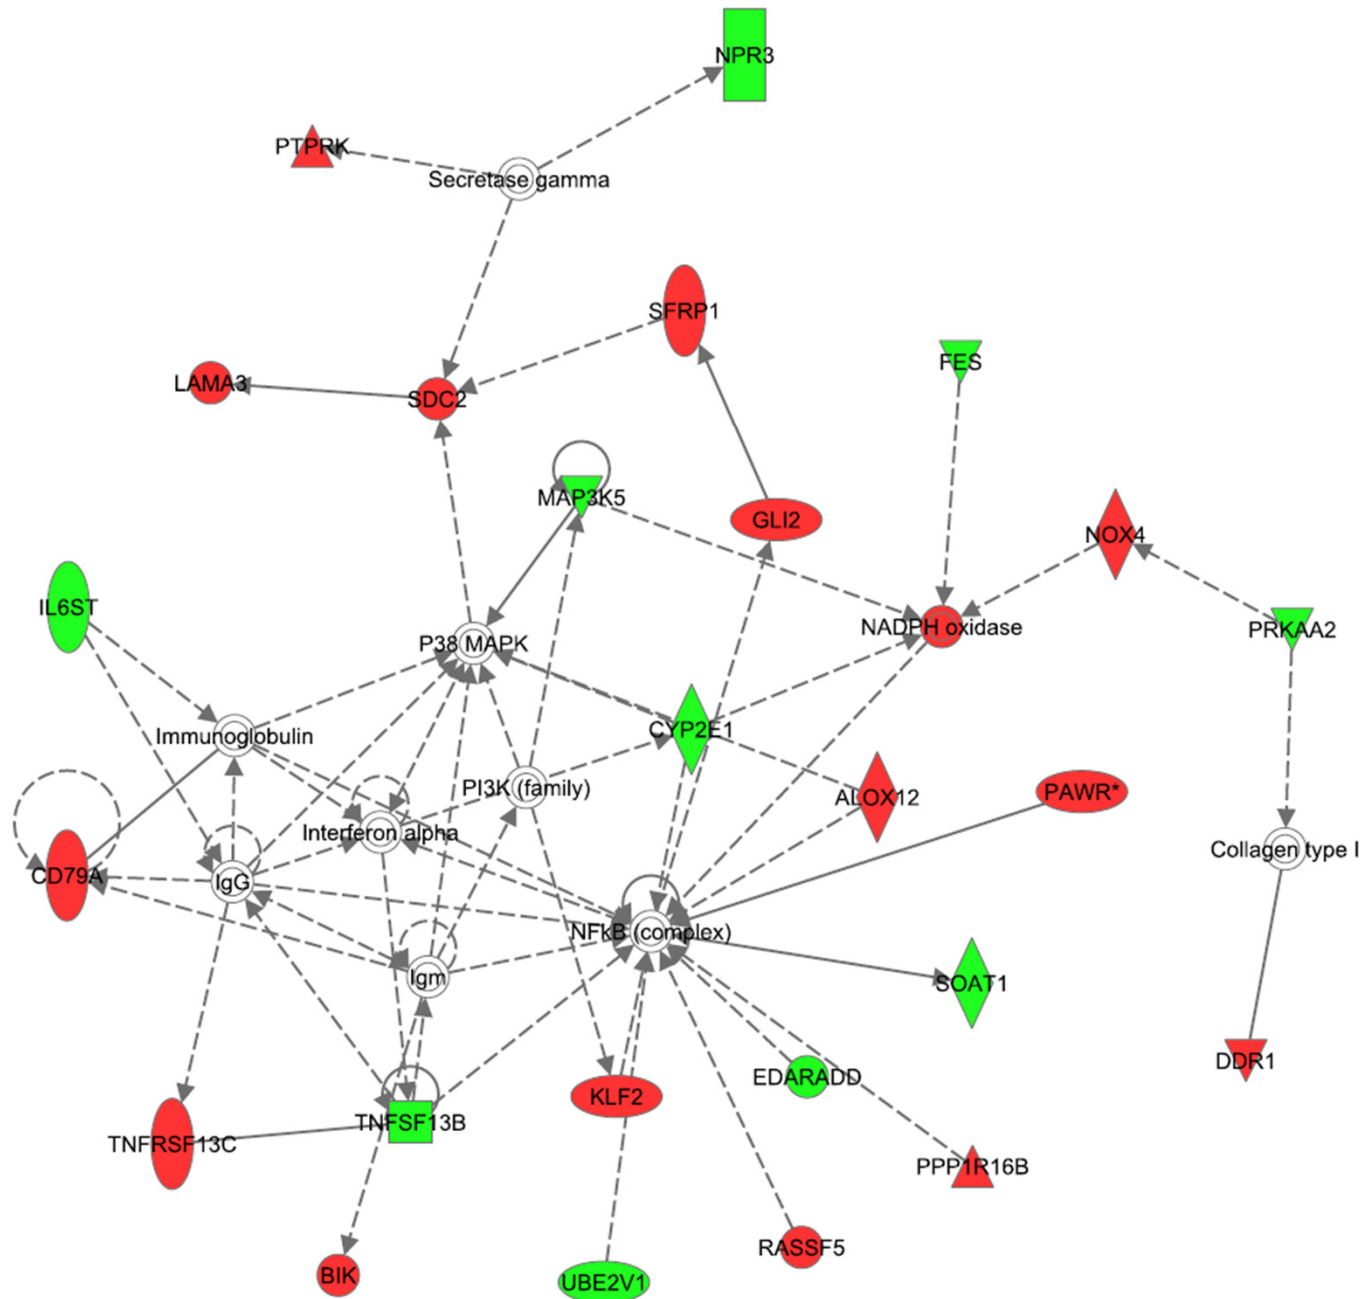

Genes colored in red (green) co-located with a CpG whose DNA methylation level positively (negatively) correlated with chronological age.

# Network 2 p=E-37

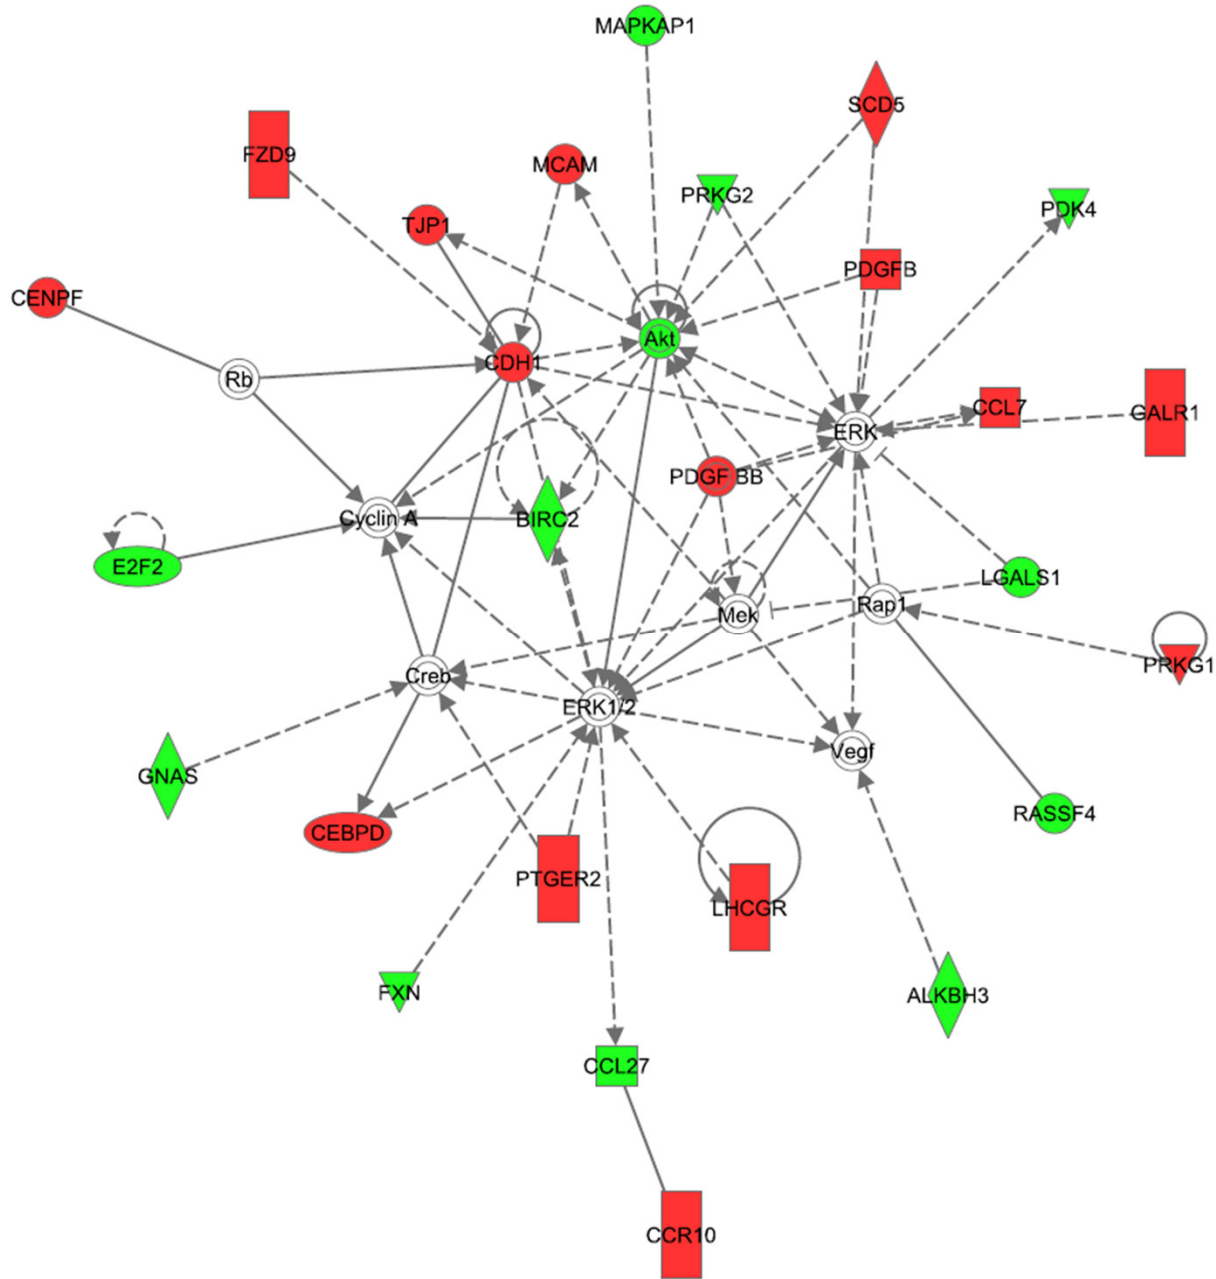

Genes colored in red (green) co-located with a CpG whose DNA methylation level positively (negatively) correlated with chronological age.

# Network 3 p=E-30

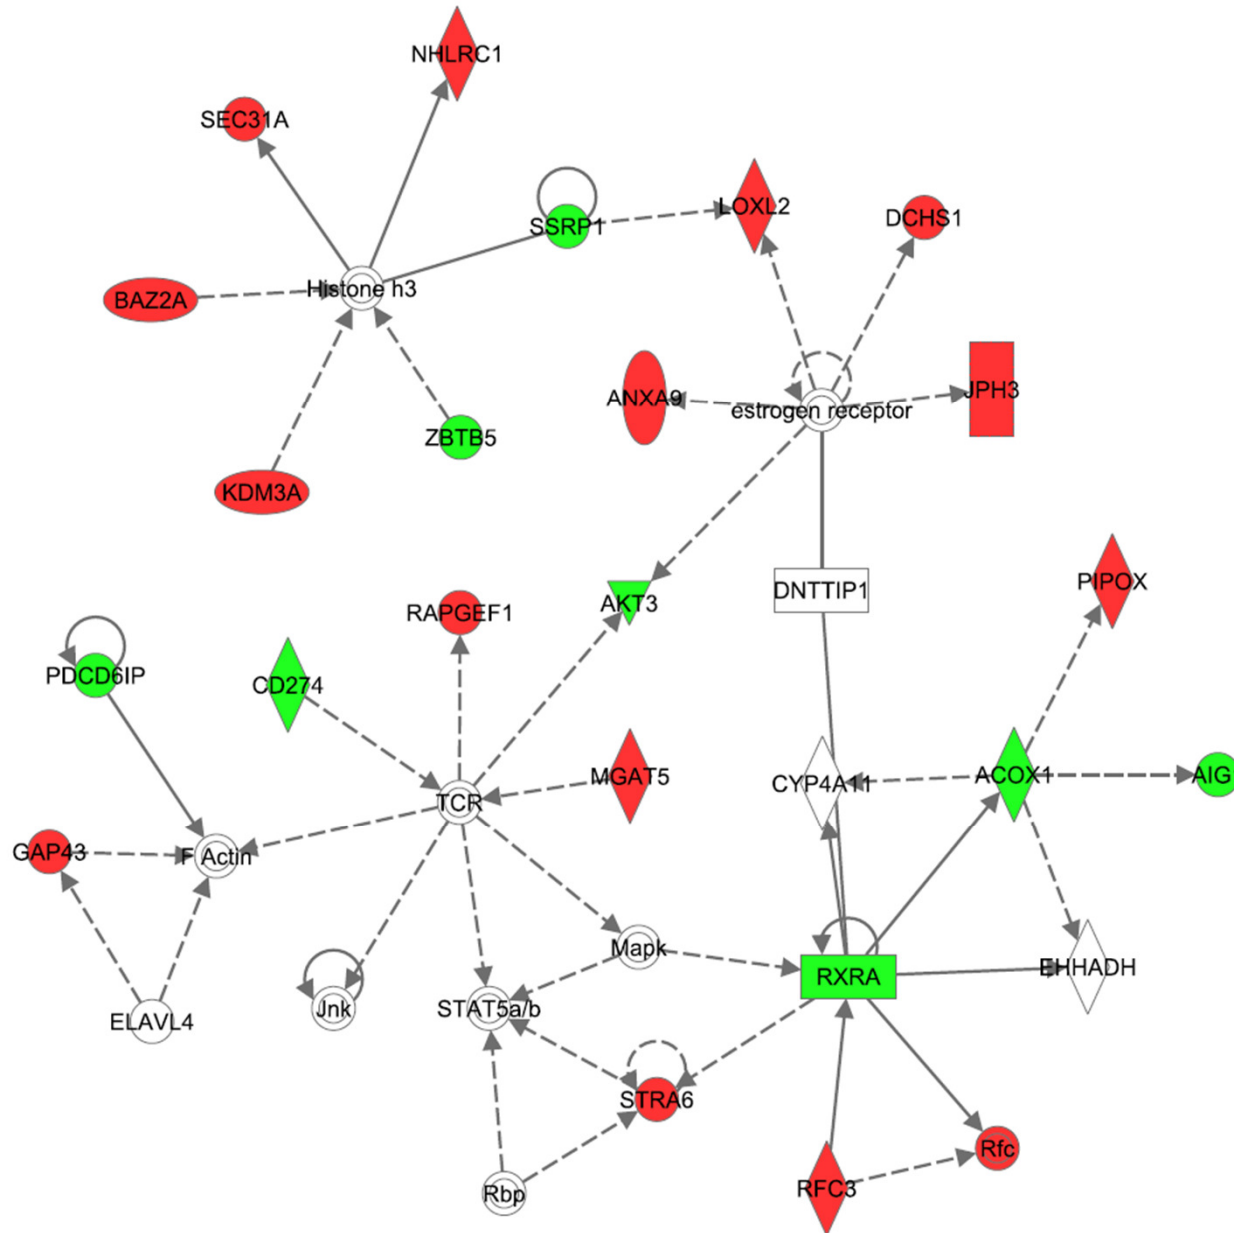

Genes colored in red (green) co-located with a CpG whose DNA methylation level positively (negatively) correlated with chronological age.

# Network 4 p=E-19

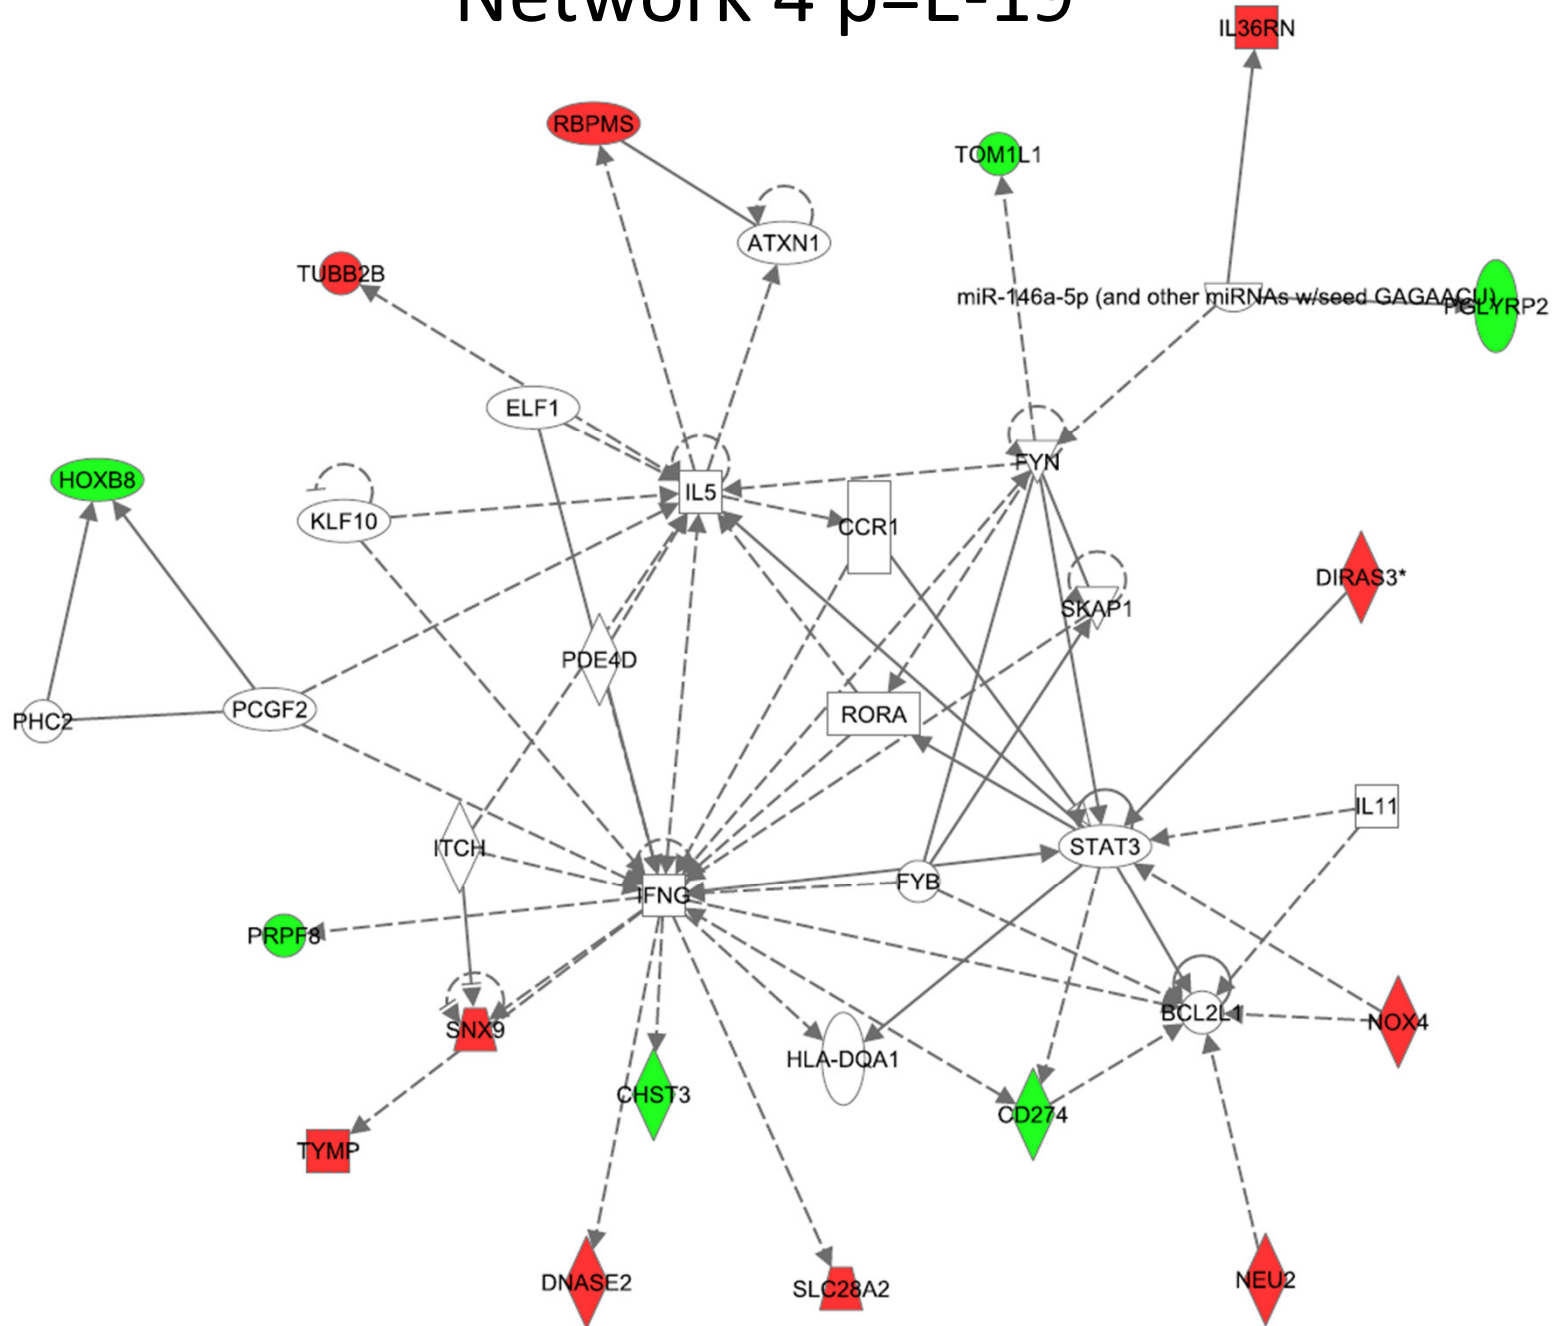



# Network 5 p=E-19

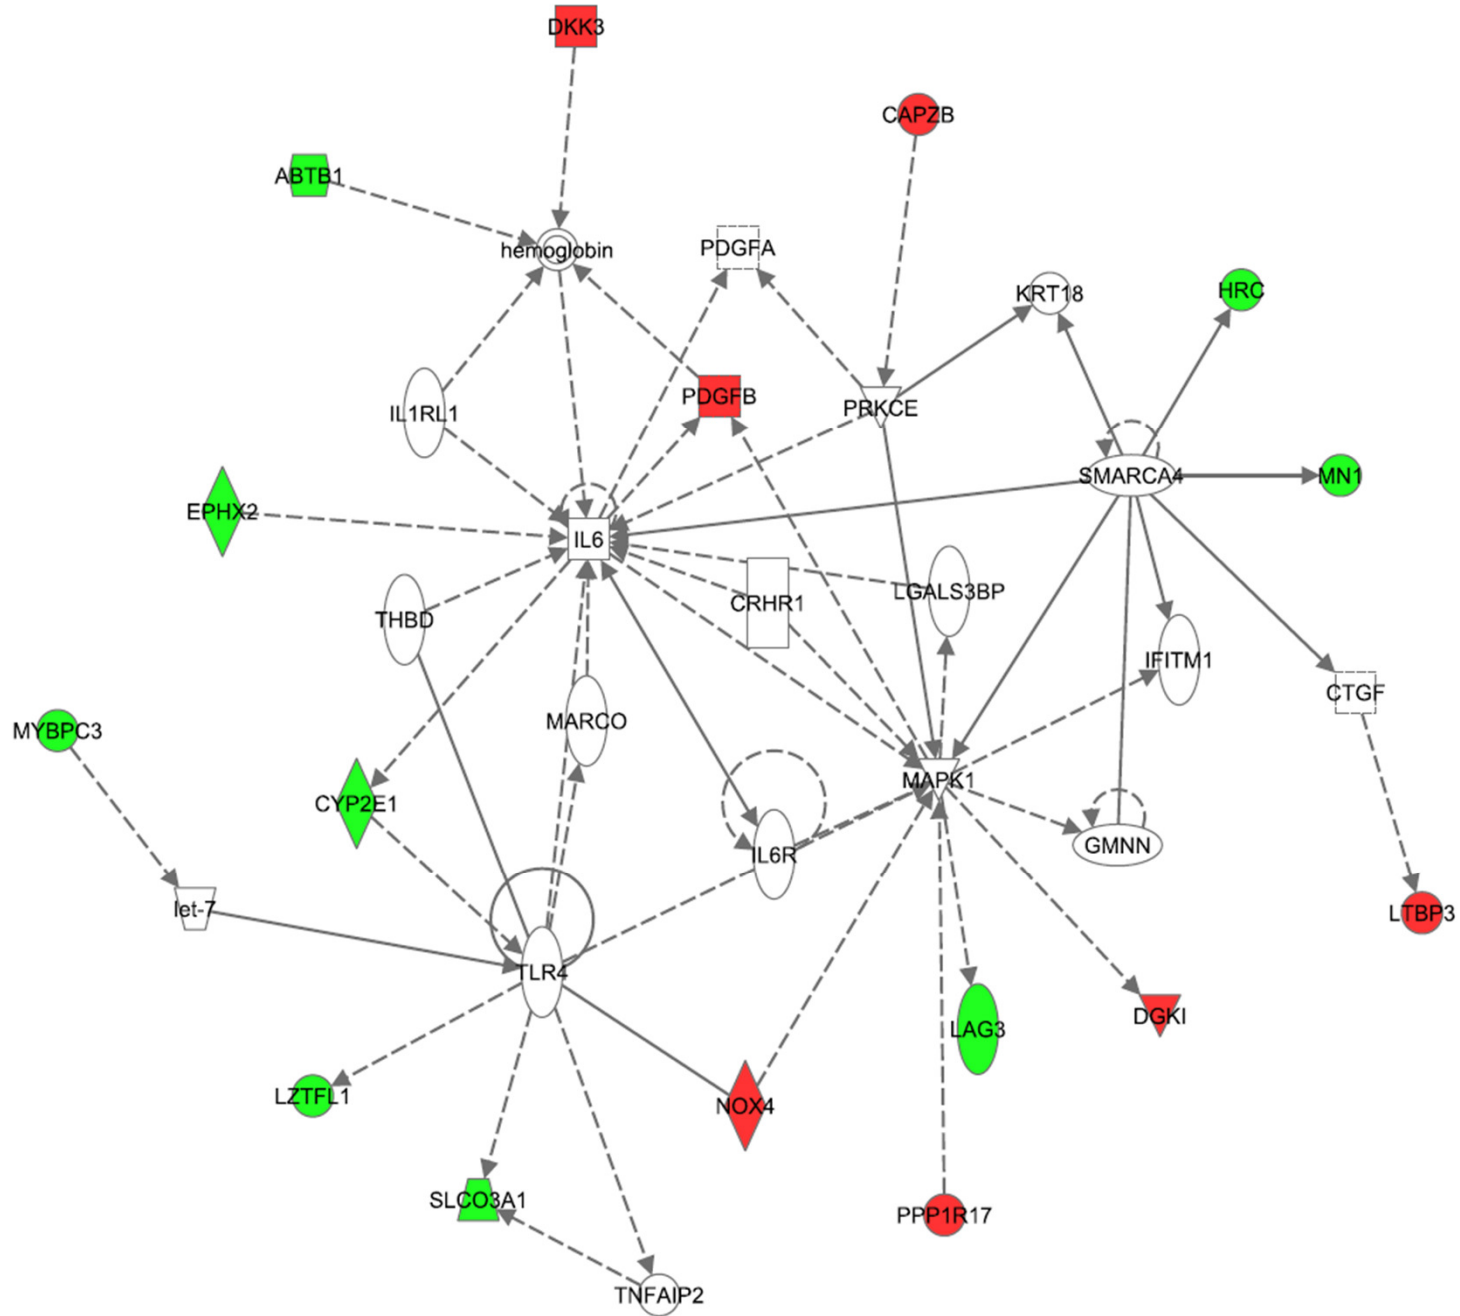

Supplement: gb-2013-14-10-r115-S7.pdf [file gb-2013-14-10-r115-S7.pdf]
