# Supplementary material for: DNA methylation age of human tissues and cell types
Source: PubMed Central journal article supplement (PMC4015143; doi:10.1186/gb-2013-14-10-r115), 2013-10-21

**A All Cancers err=40 cor=0.15, p=1.9e-29**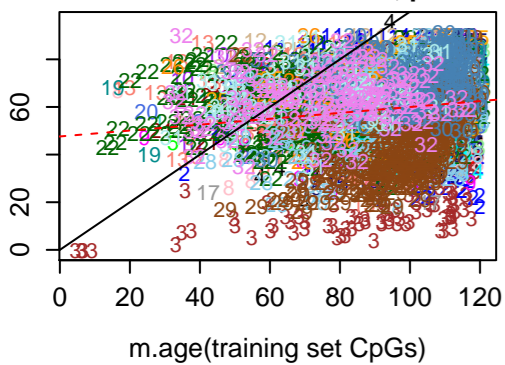**B All Cancers p = 0**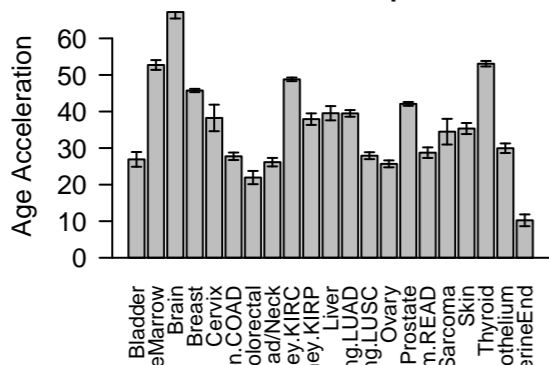**C Bladder err=31 cor=0.051, p=0.59**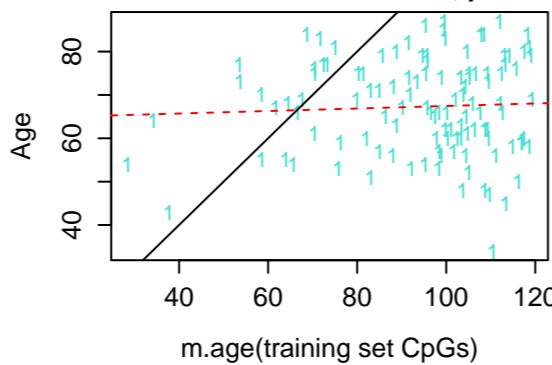**D BoneMarrow err=52 cor=0.089, p=0.22**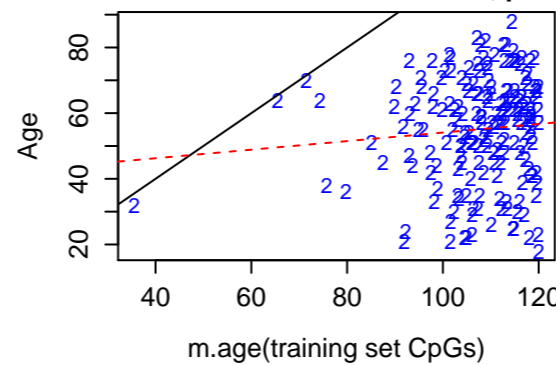**E Brain err=70 cor=0.61, p=1.2e-15**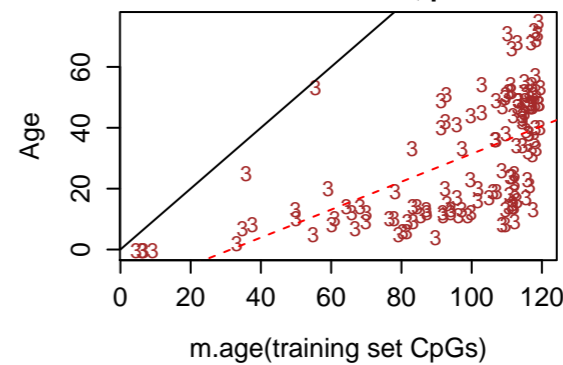**F Breast err=48 cor=0.31, p=6.8e-29**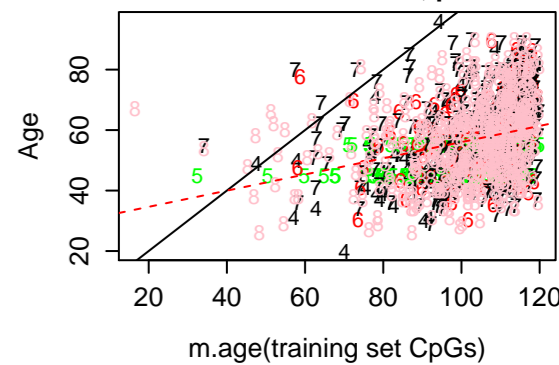**G Cervix err=42 cor=0.21, p=0.19**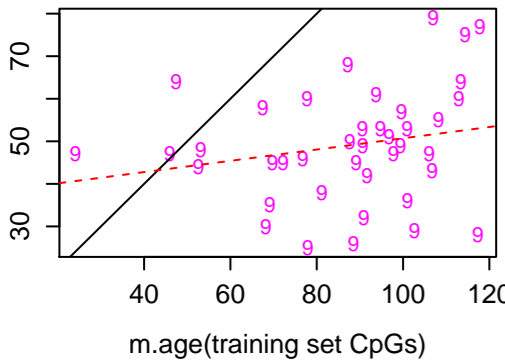**H Colon.COAD err=30 cor=0.071, p=0.18**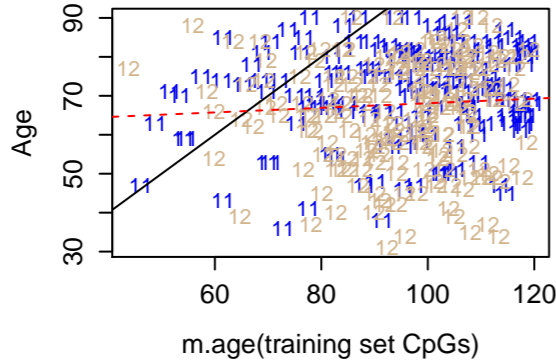**I Colorectal err=26 cor=0.37, p=0.00011**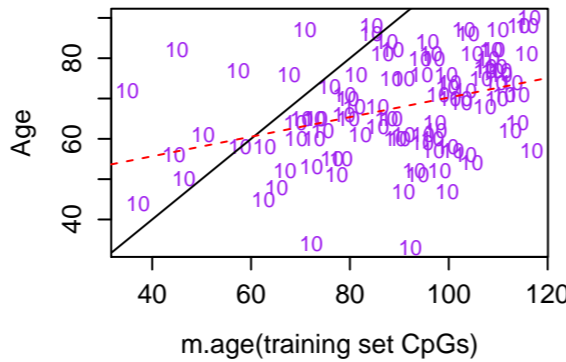**J Head/Neck err=30 cor=0.13, p=0.022**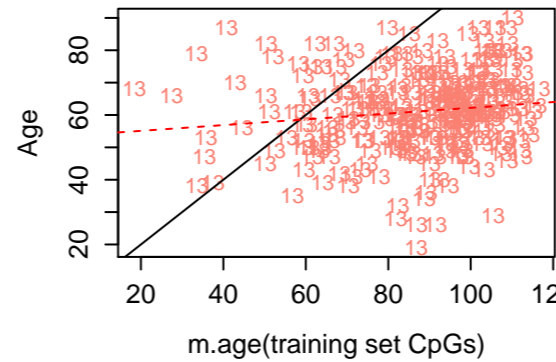**K Kidney.KIRC err=49 cor=0.45, p=2.1e-26**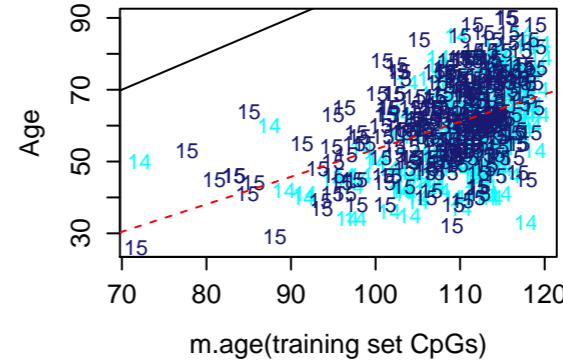**L Kidney.KIRP err=36 cor=0.38, p=0.00043**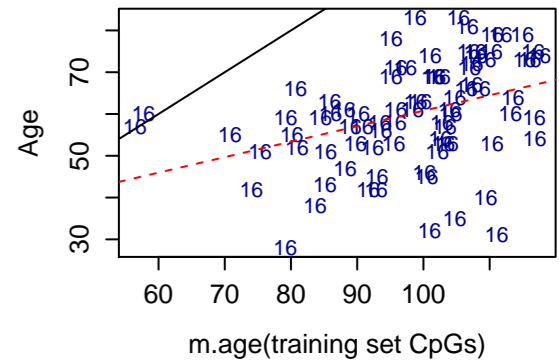**M Liver err=39 cor=0.42, p=5e-04**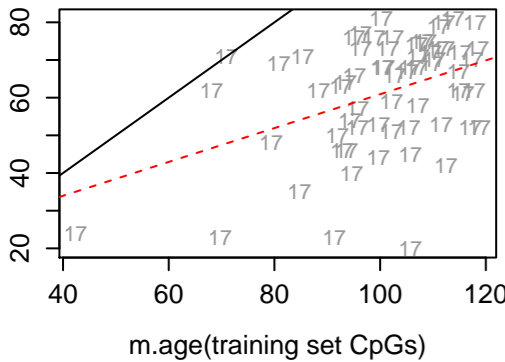**N Lung.LUAD err=41 cor=0.24, p=4.7e-05**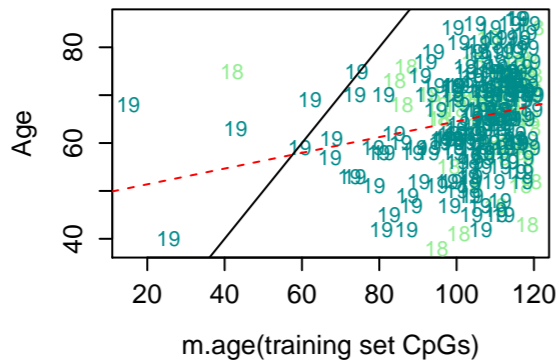**O Lung.LUSC err=31 cor=0.28, p=5.2e-07**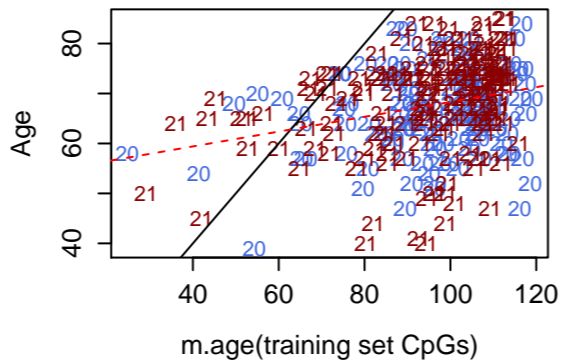**P Ovary err=29 cor=0.068, p=0.099**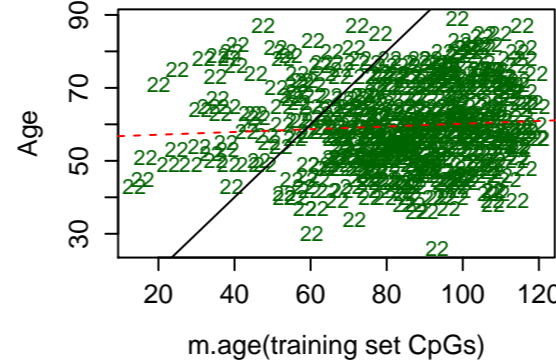**Q Prostate err=43 cor=0.27, p=1.1e-05**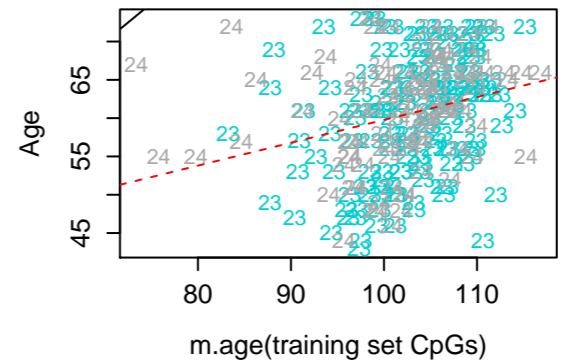**R Rectum.READ err=31 cor=0.049, p=0.53**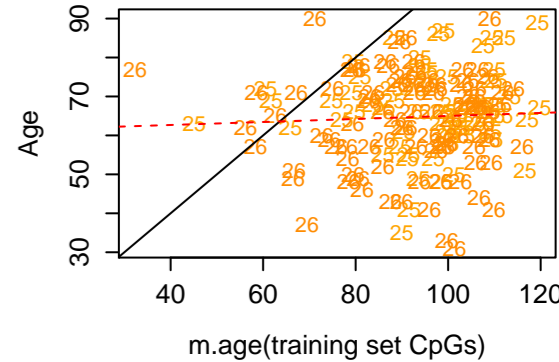**S Sarcoma err=37 cor=0.1, p=0.63**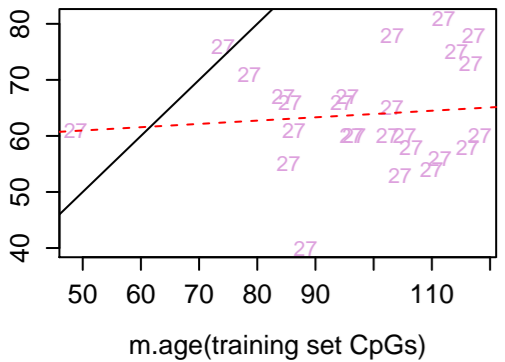**T Skin err=37 cor=0.25, p=0.00074**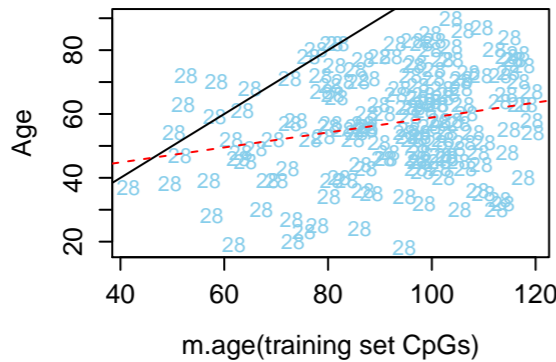**U Thyroid err=54 cor=0.6, p=7.6e-30**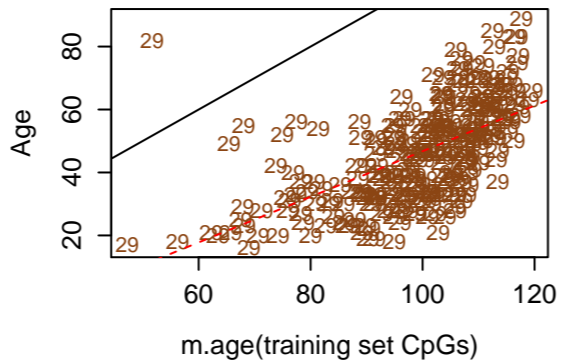**V Urothelium err=32 cor=0.17, p=0.038**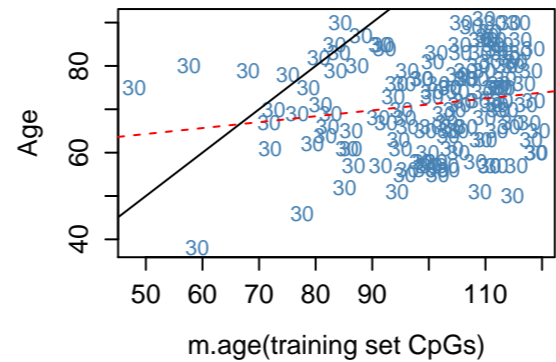**W UterineEnd err=18 cor=0.13, p=0.082**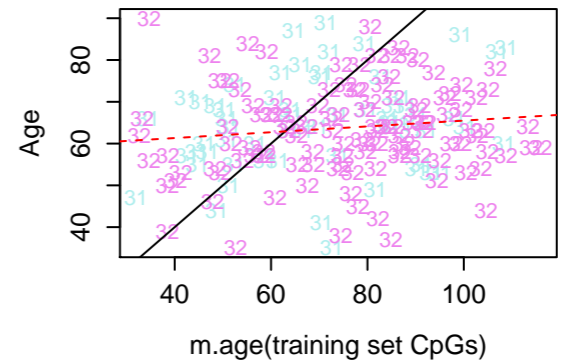

Supplement: gb-2013-14-10-r115-S13.pdf [file gb-2013-14-10-r115-S13.pdf]
