# Supplementary material for: DNA methylation age of human tissues and cell types
Source: PubMed Central journal article supplement (PMC4015143; doi:10.1186/gb-2013-14-10-r115), 2013-10-21

**A All Brain err=3.2 cor=0.96, p<1e-200**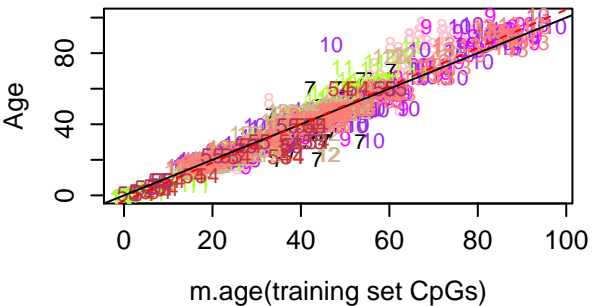**B Data 7 Train err=3.7 cor=0.81, p=2.5e-40**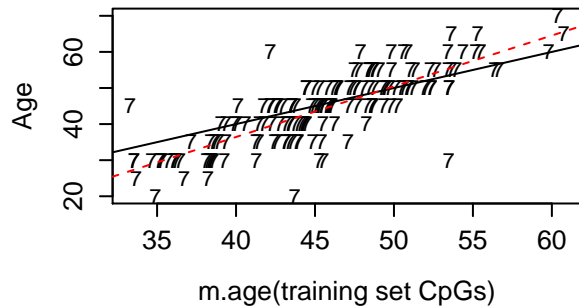**C Data 8 Train err=5.7 cor=0.95, p=1.9e-58**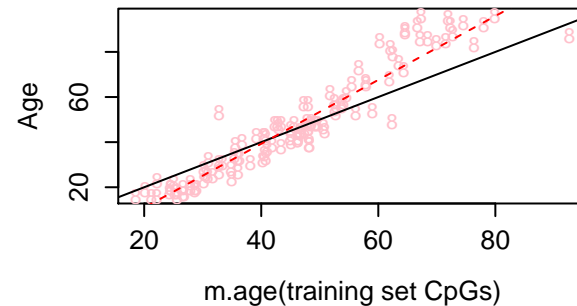**D Data 9 Train err=2.6 cor=0.98, p=1e-93**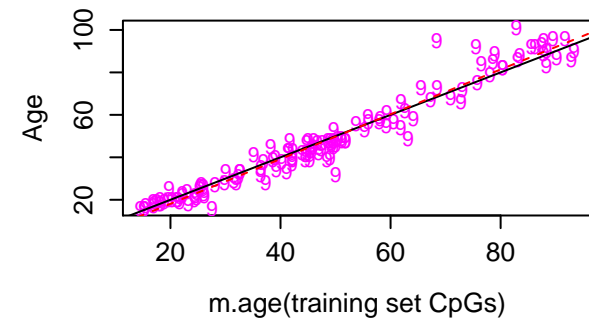**E Data 10 Train err=3.3 cor=0.96, p=7.5e-70**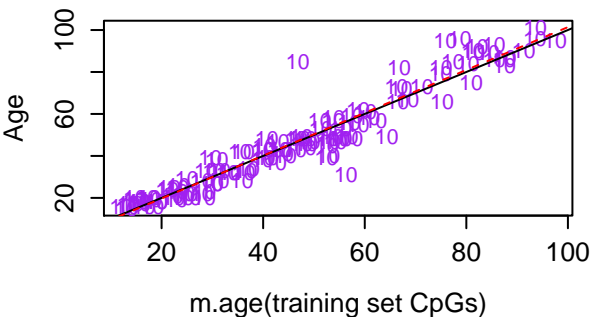**F Data 11 Train err=1.4 cor=0.98, p=3.8e-76**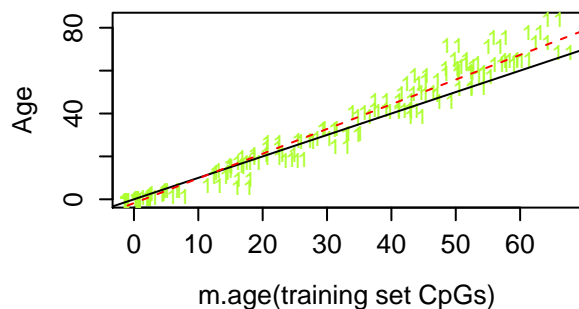**G Data12 err=3.1 Train cor=0.94, p=1.2e-68**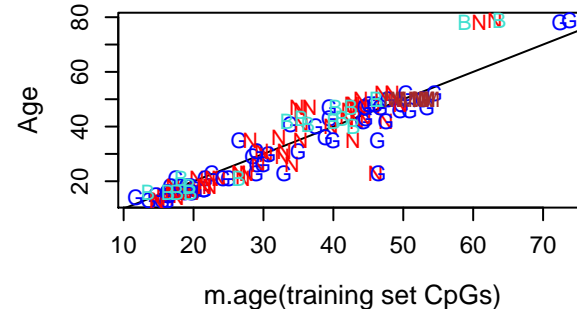**H Data 13 Train err=2.2 cor=0.99, p=3.4e-108**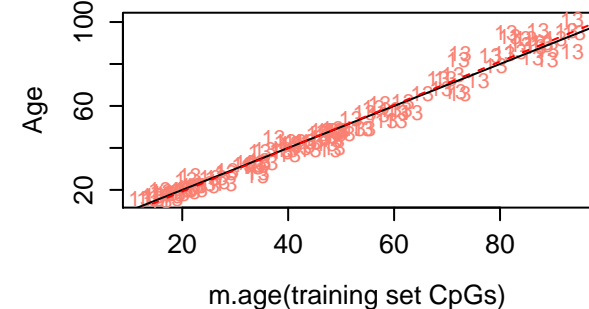**I Data 54 Test err=5.9 cor=0.92, p=9.5e-09**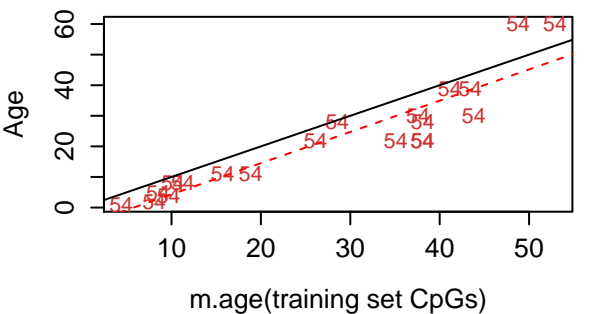**J Data 55 Test err=1.5 cor=0.98, p=3.3e-11**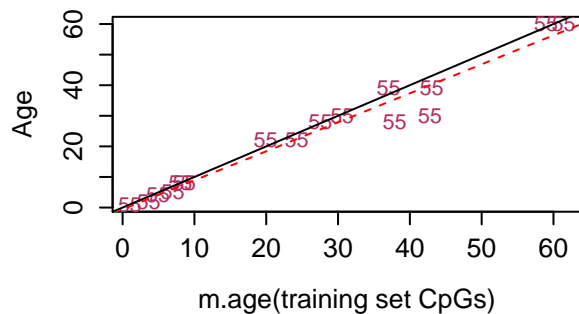**K Data 8,9,10,13 p = 0.93**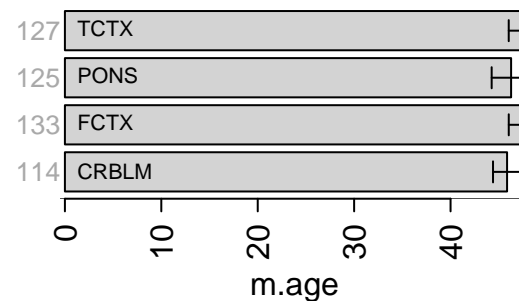**L Data 54, 55 p = 0.44**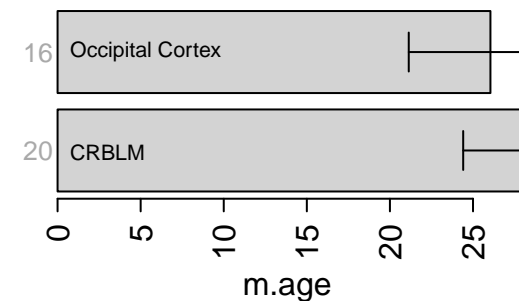

Supplement: gb-2013-14-10-r115-S5.pdf [file gb-2013-14-10-r115-S5.pdf]
