# Supplementary material for: DNA methylation age of human tissues and cell types
Source: PubMed Central journal article supplement (PMC4015143; doi:10.1186/gb-2013-14-10-r115), 2013-10-21

**A All Breast Data err=12 cor=0.82, p=4.7e-33**

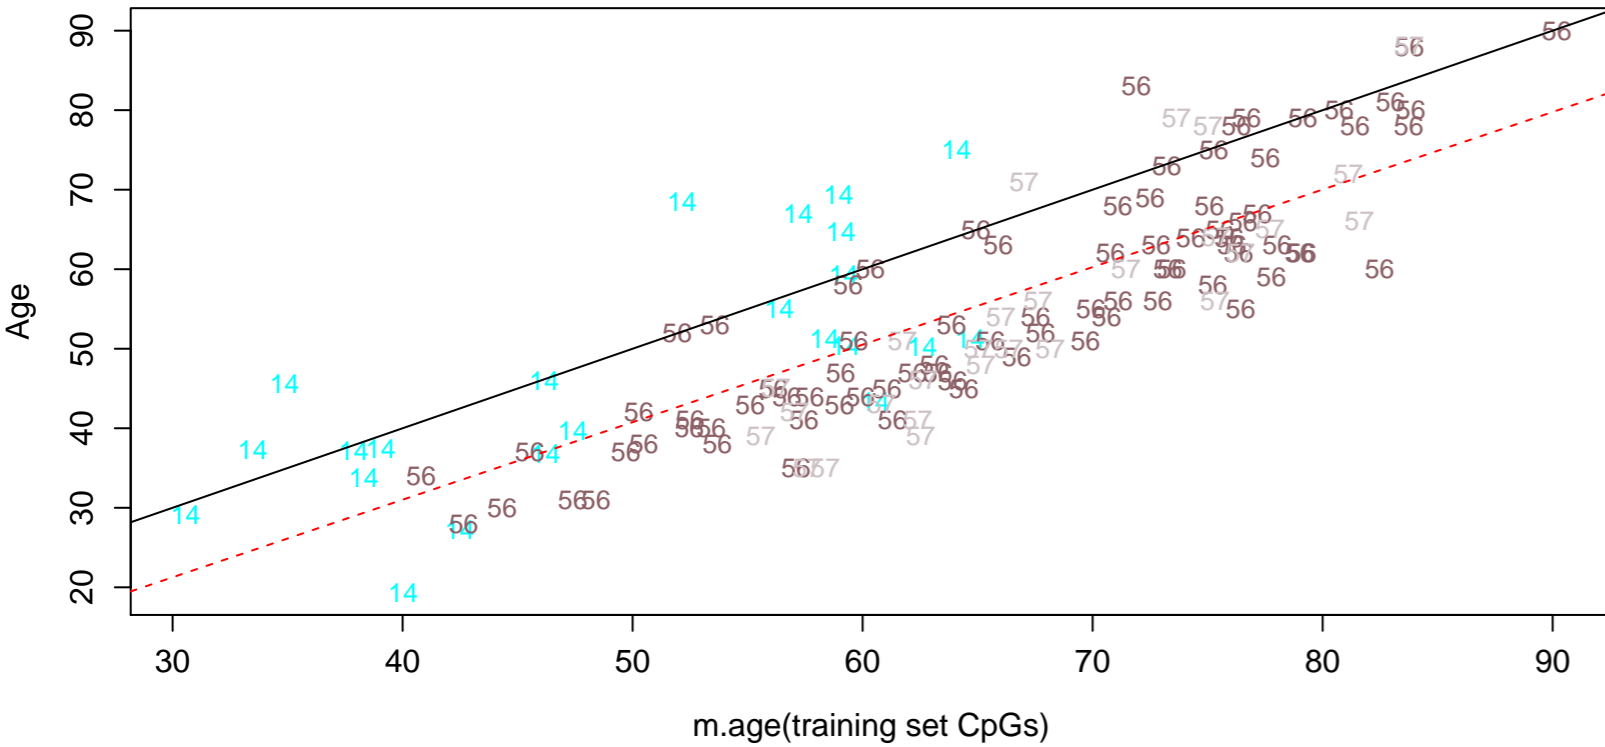

**B Breast Data 14 Train err=8.9 cor=0.73, p=7.7e-05**

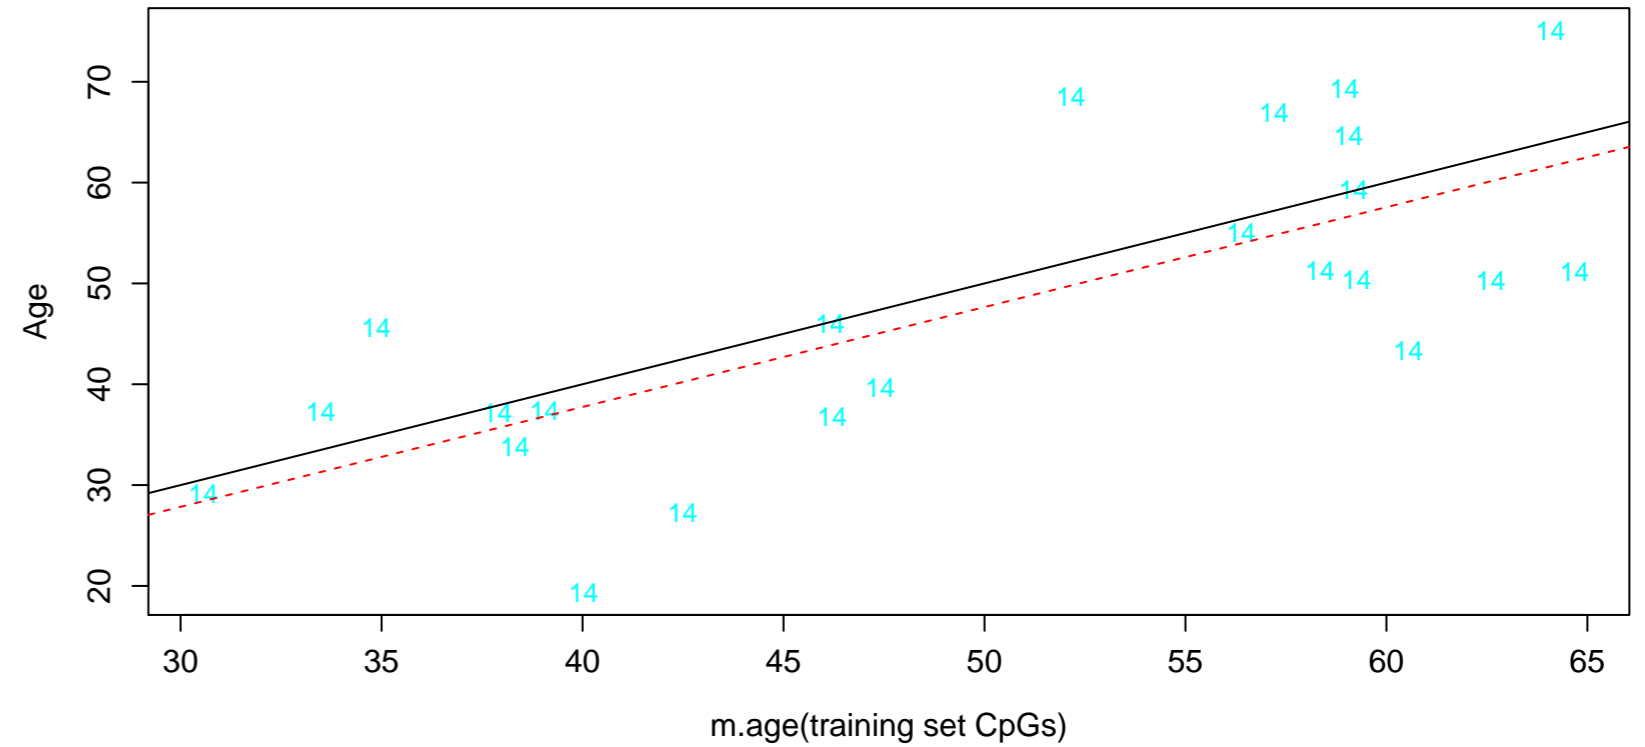

**C Breast Data 56 Test err=12 cor=0.89, p=1.1e-28**

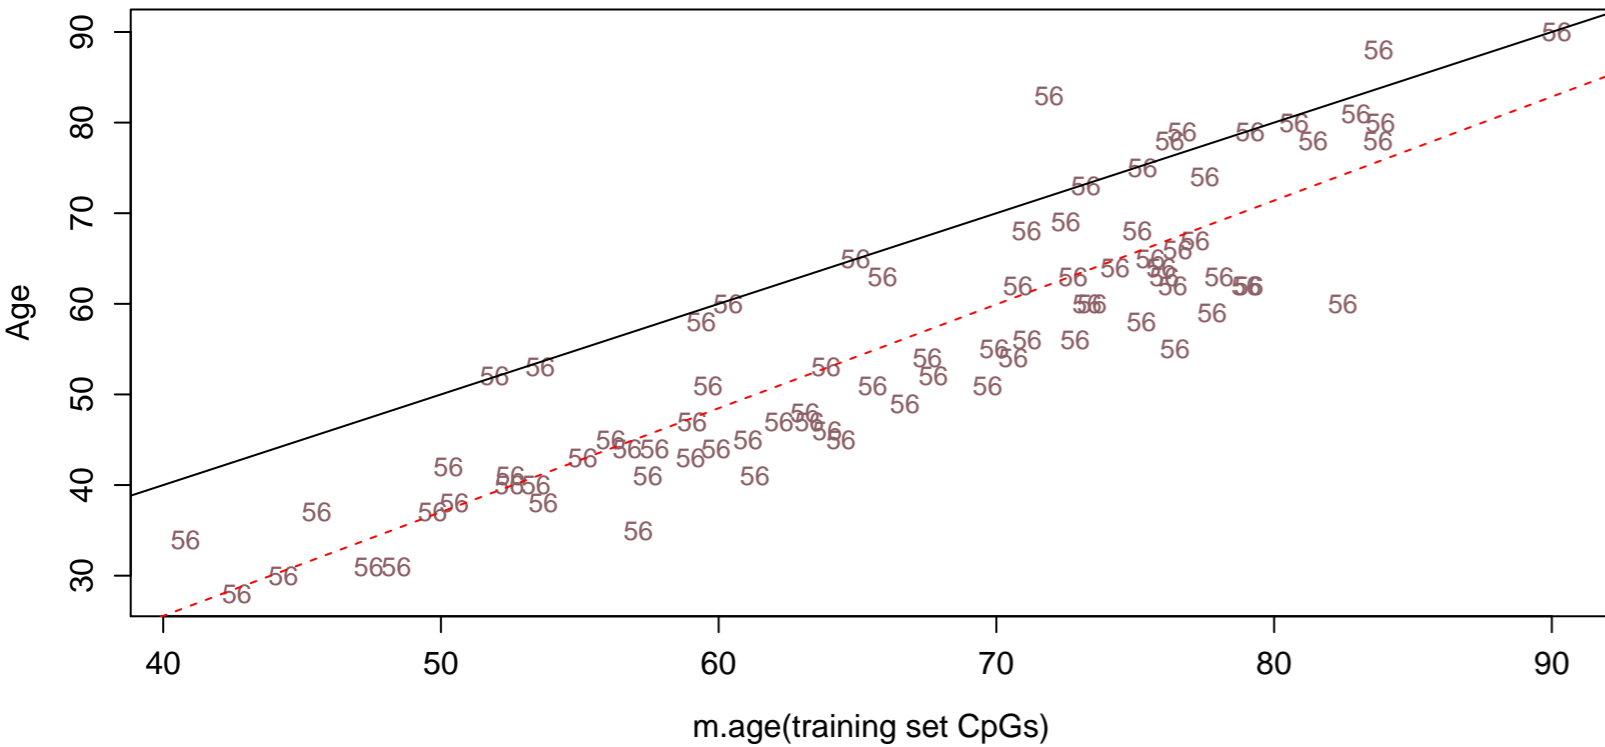

**D Breast Data 57 Test err=15 cor=0.86, p=9e-09**

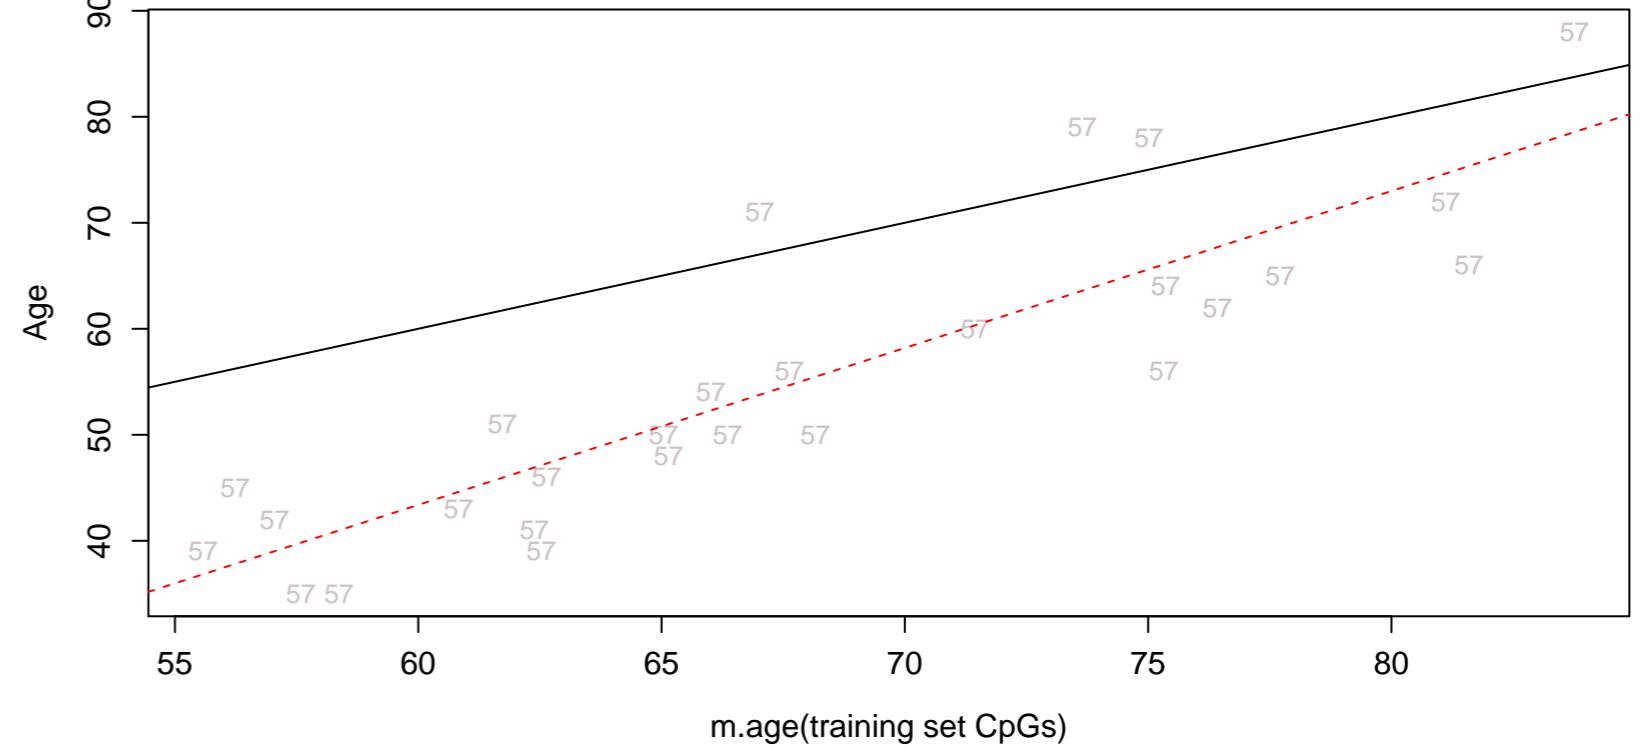

Supplement: gb-2013-14-10-r115-S6.pdf [file gb-2013-14-10-r115-S6.pdf]
