# Supplementary material for: DNA methylation age of human tissues and cell types
Source: PubMed Central journal article supplement (PMC4015143; doi:10.1186/gb-2013-14-10-r115), 2013-10-21

**A TissueVar: Fetal vs Adult, Data 77 cor=0.8, p<1e-200**

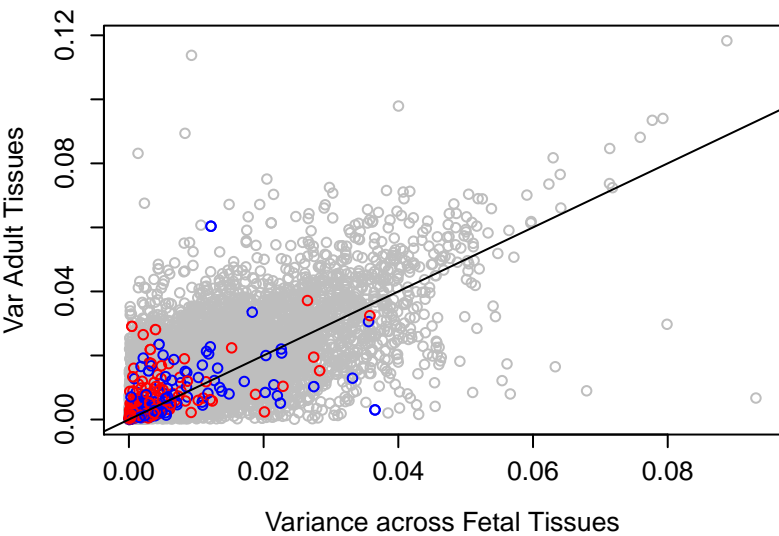

**B Variance Adult Somatic Tissues p = 0.0011**

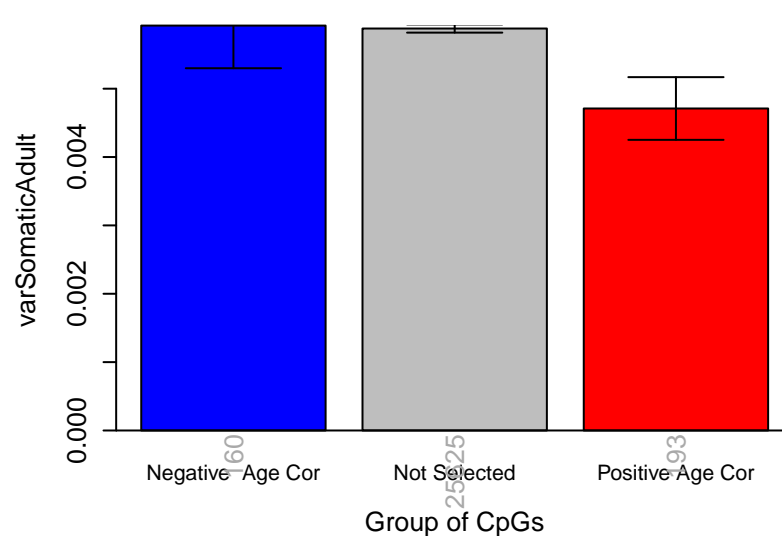

**C Variance Fetal Somatic Tissues p = 1e-04**

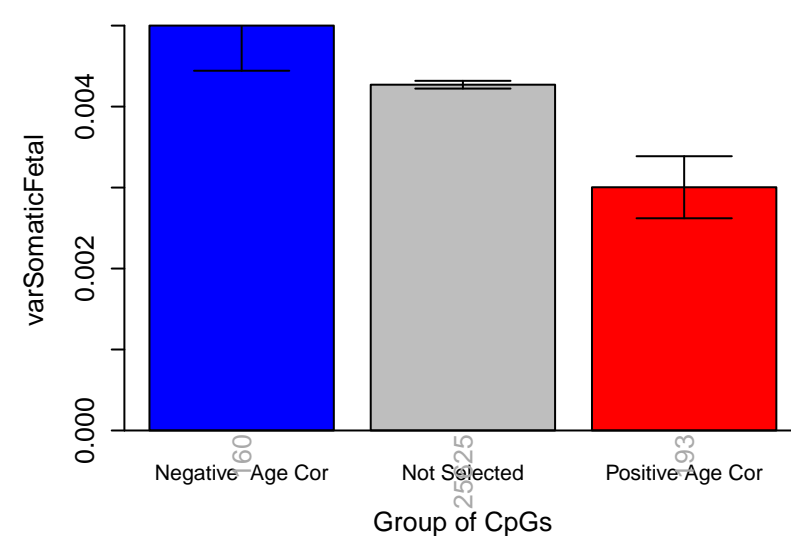

**D TissueVar: F.tissueTrain.vs Data 77 cor=0.73, p<1e-200**

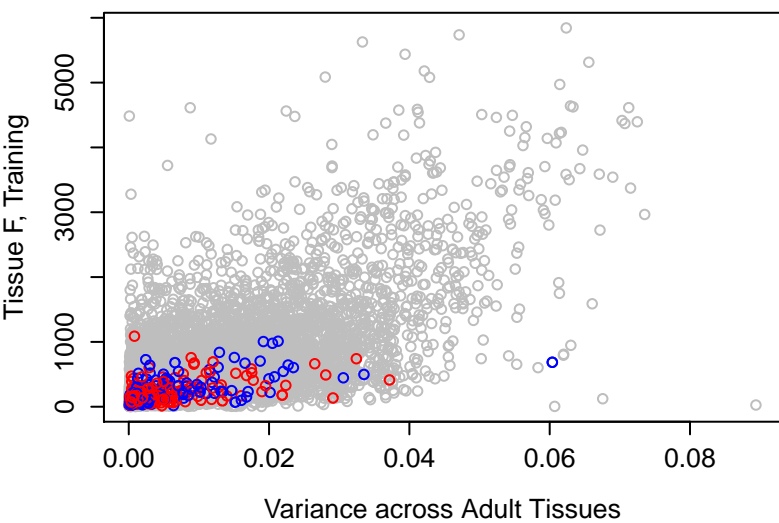

**E Age Effects: Training vs All cor=0.97, p<1e-200**

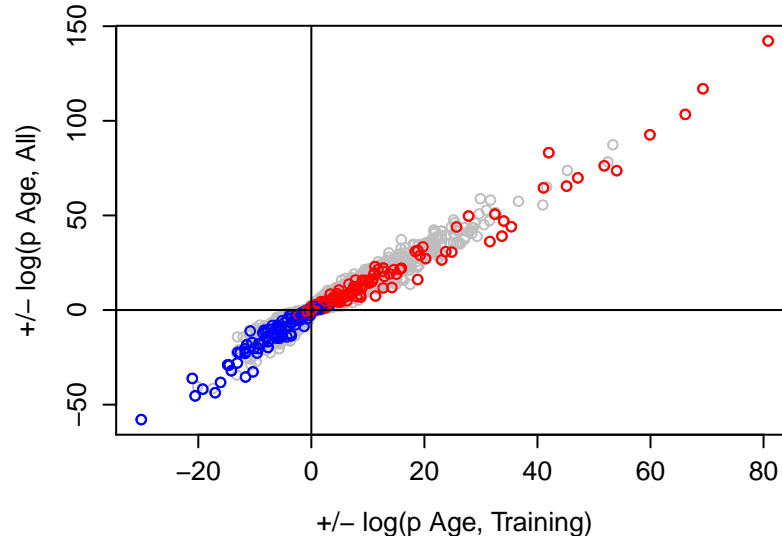

**F Age Effect vs Tissue F, Training**

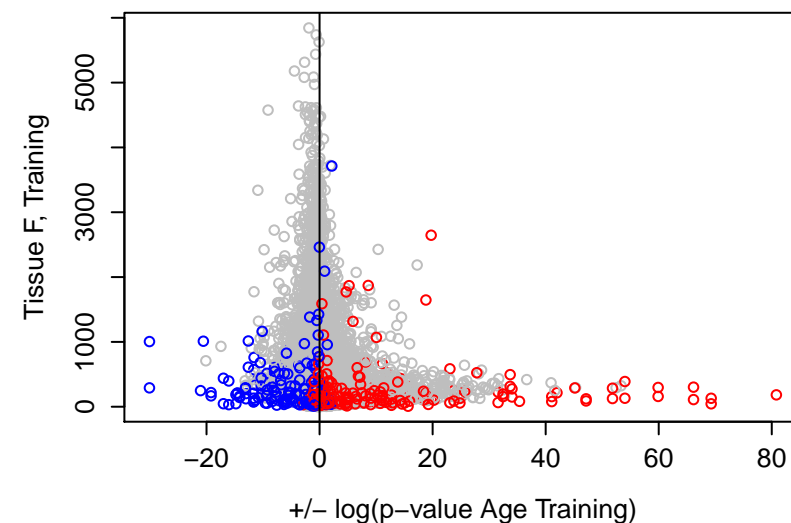

Supplement: gb-2013-14-10-r115-S8.pdf [file gb-2013-14-10-r115-S8.pdf]
