# Supplementary material for: DNA methylation age of human tissues and cell types
Source: PubMed Central journal article supplement (PMC4015143; doi:10.1186/gb-2013-14-10-r115), 2013-10-21

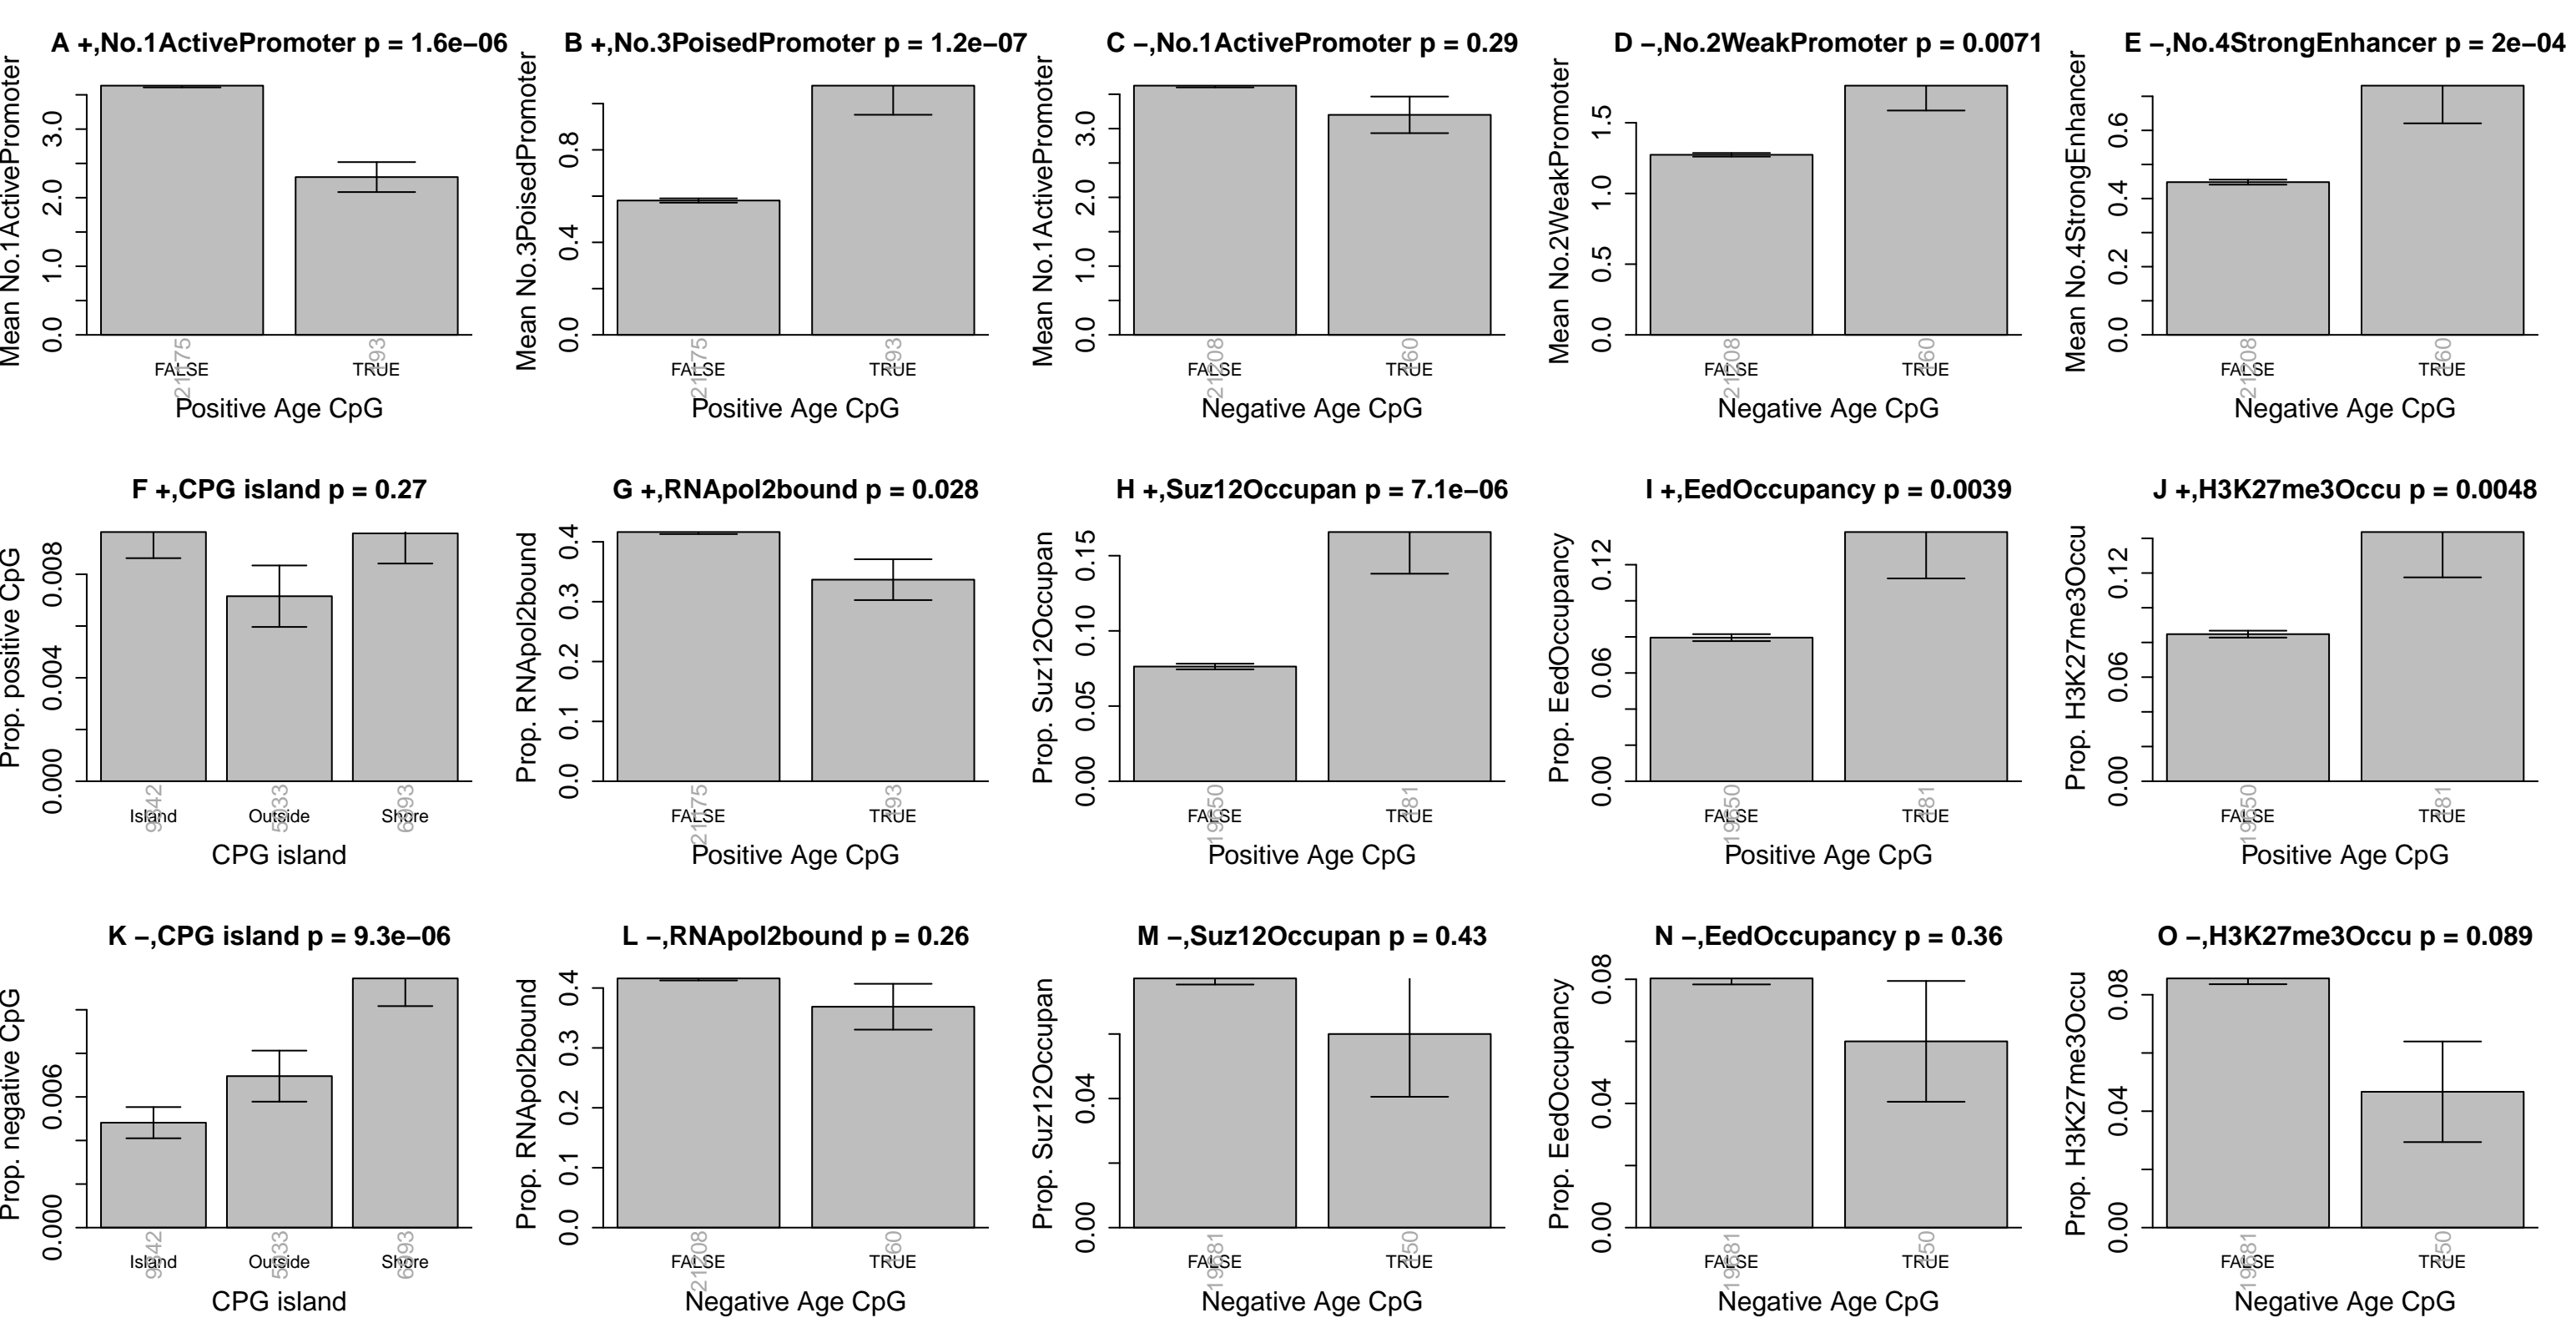

Supplement: gb-2013-14-10-r115-S9.pdf [file gb-2013-14-10-r115-S9.pdf]
