# Supplementary material for: DNA methylation age of human tissues and cell types
Source: PubMed Central journal article supplement (PMC4015143; doi:10.1186/gb-2013-14-10-r115), 2013-10-21

**A Twin data, Age distribution**

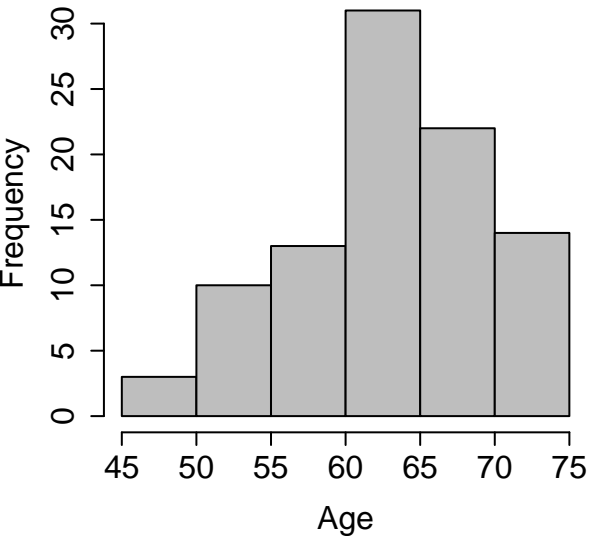

**B AgeAccel, all twins cor=0.24, p=0.21**

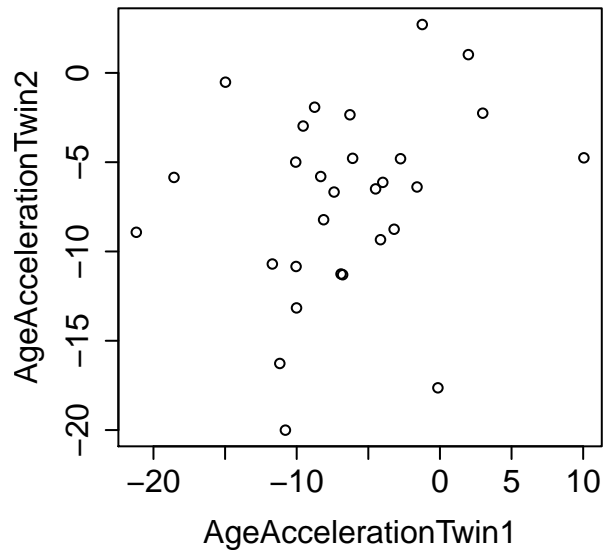

**C, AgeAccel, MZ twins cor=0.4, p=0.18**

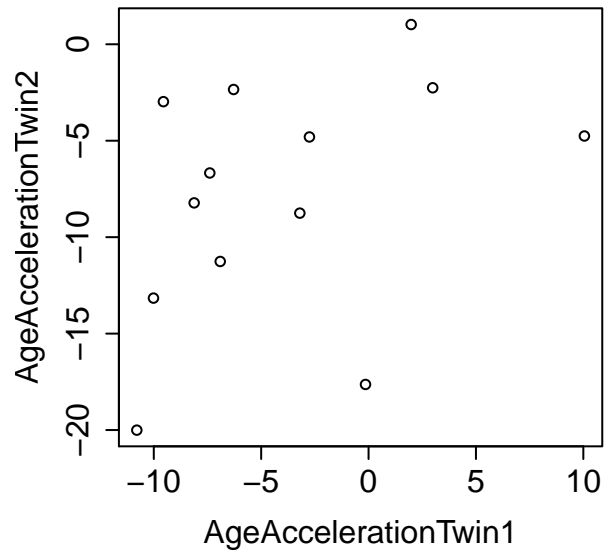

**D, AgeAccel, DZ twins cor=0.2, p=0.46**

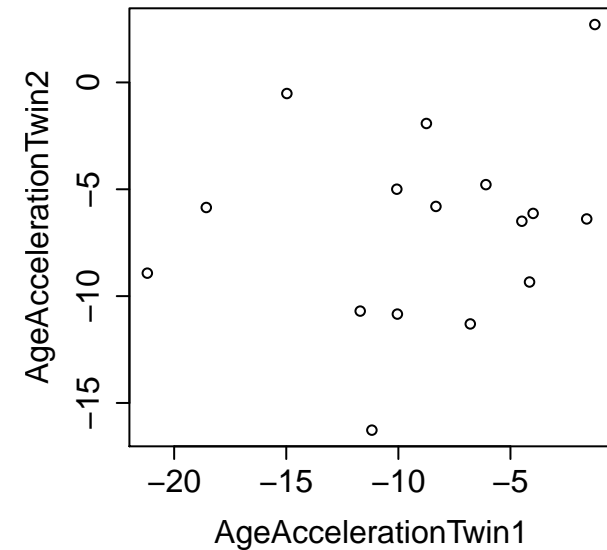

**E Twin, Age distribution**

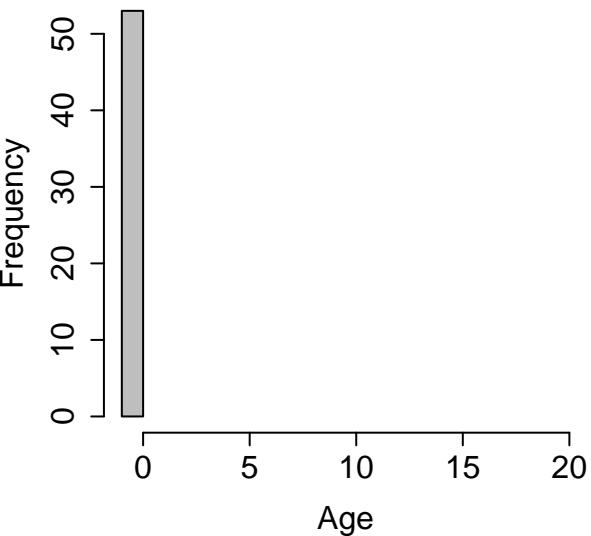

**F, AgeAccel, all twins cor=0.31, p=0.12**

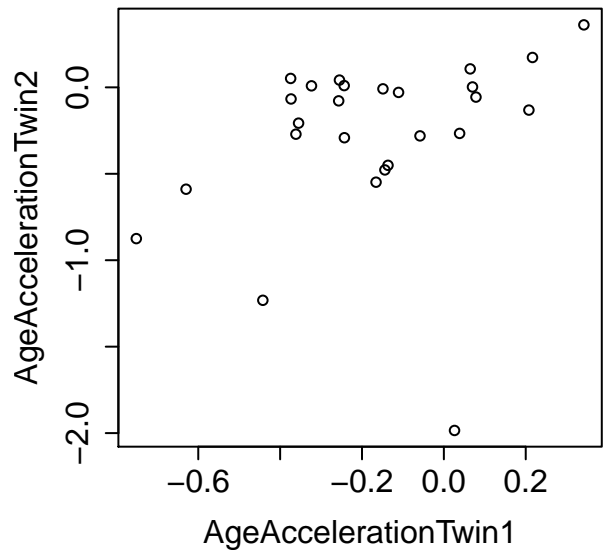

**F AgeAccel, MZ twins cor=0.77, p=3e-04**

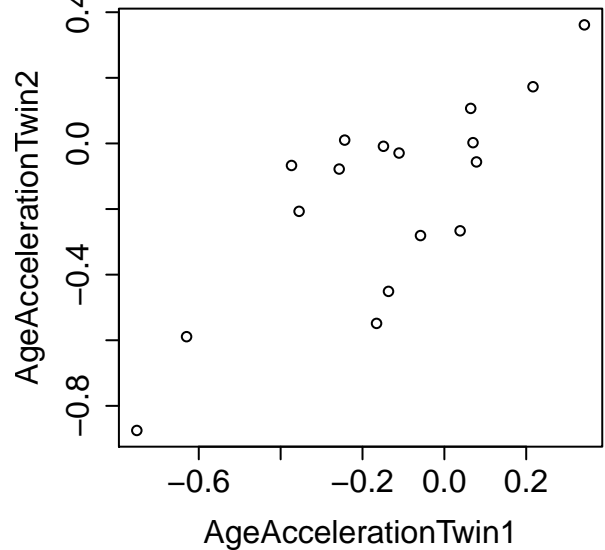

**G AgeAccel, DZ twins cor=-0.21, p=0.59**

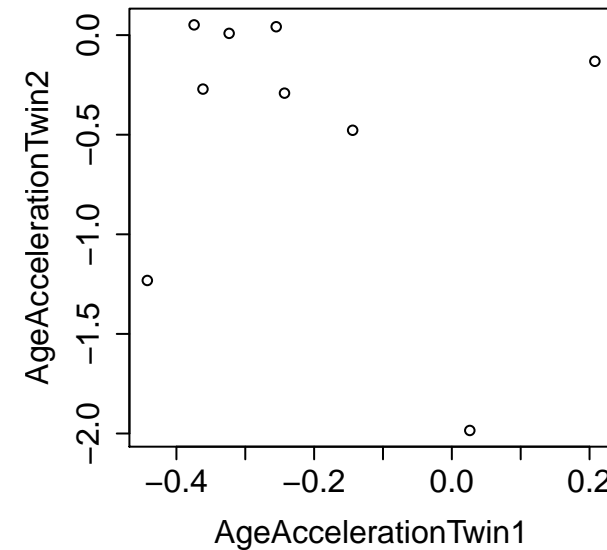

Supplement: gb-2013-14-10-r115-S10.pdf [file gb-2013-14-10-r115-S10.pdf]
