# Supplementary material for: DNA methylation age of human tissues and cell types
Source: PubMed Central journal article supplement (PMC4015143; doi:10.1186/gb-2013-14-10-r115), 2013-10-21

**A AcuteMyeloidLeukemiaLAML.450.TCGA TP53 p = 0.0023**

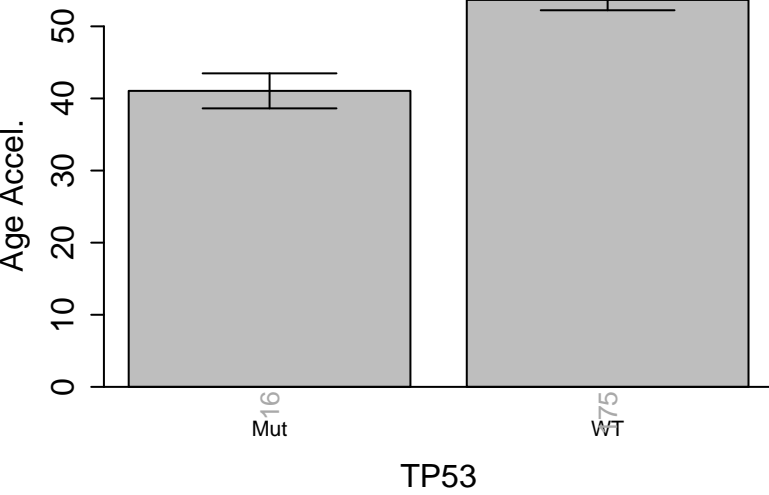

**B BreastCancerTCGA27k TP53 p = 1.4e-05**

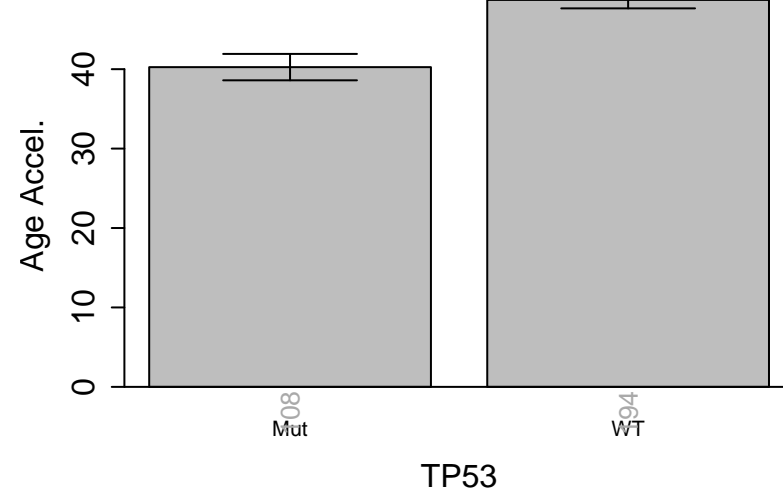

**C BreastCancerTCGA450k TP53 p = 3.7e-08**

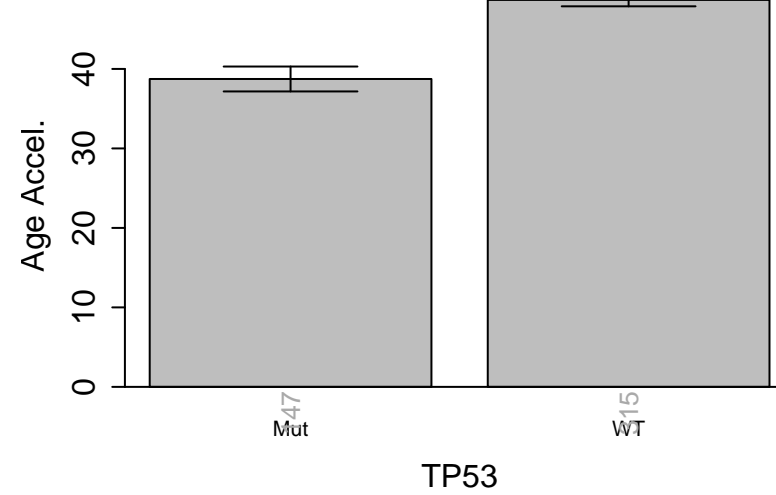

**D TCGA.COAD450 TP53 p = 0.7**

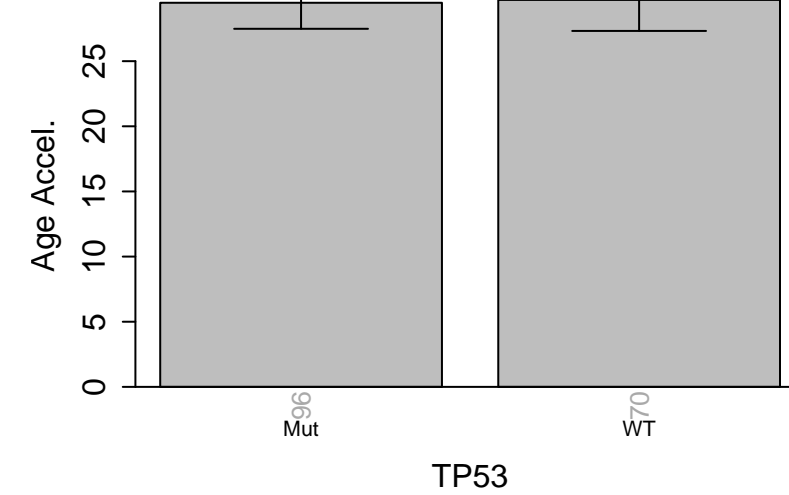

**E LungAdenoTCGA27k TP53 p = 0.39**

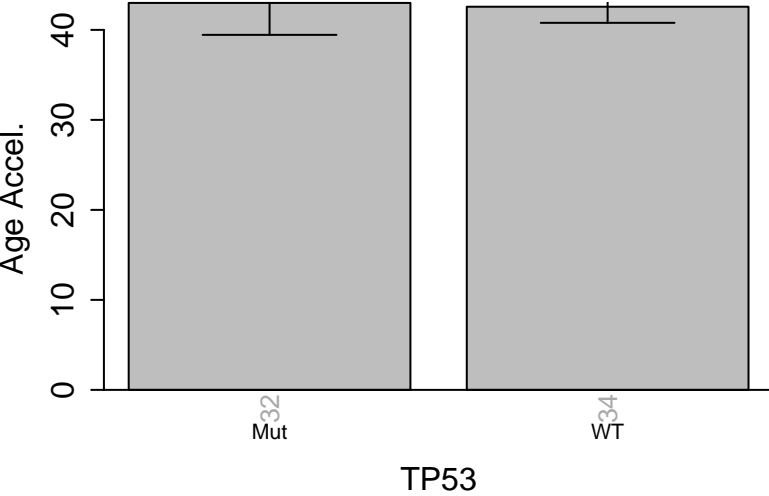

**F LungAdenoTCGA450k TP53 p = 0.52**

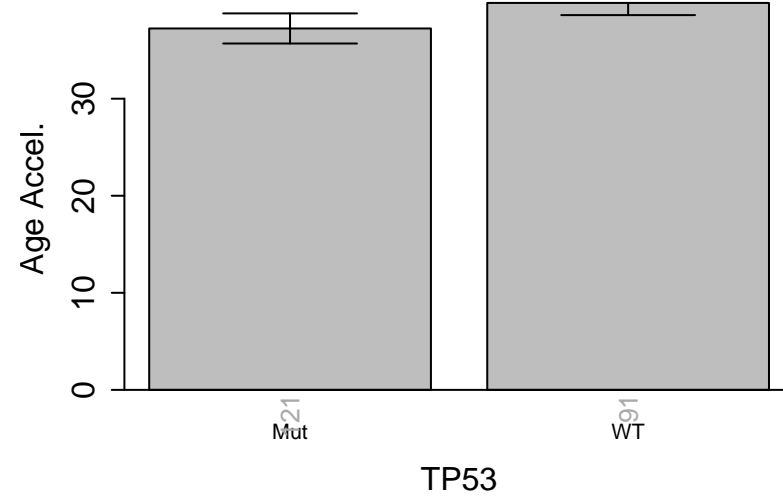

**G LungScctCGA27k TP53 p = 0.047**

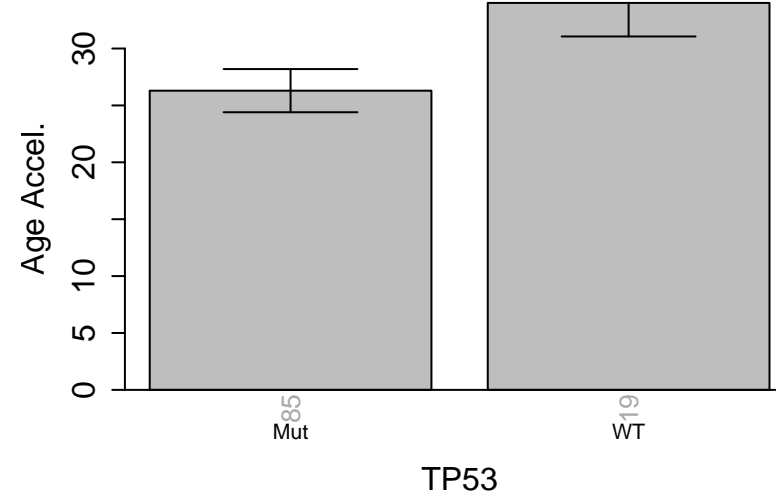

**H LungScctCGA450k TP53 p = 0.4**

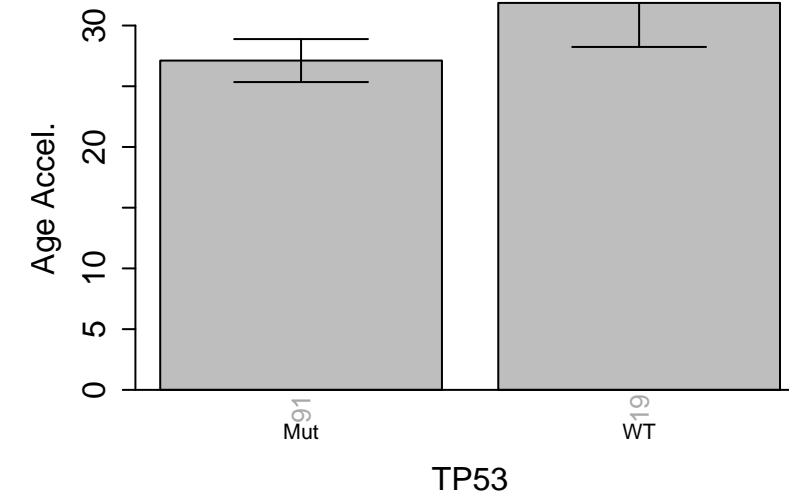

**I OVAR.27TCGA TP53 p = 0.03**

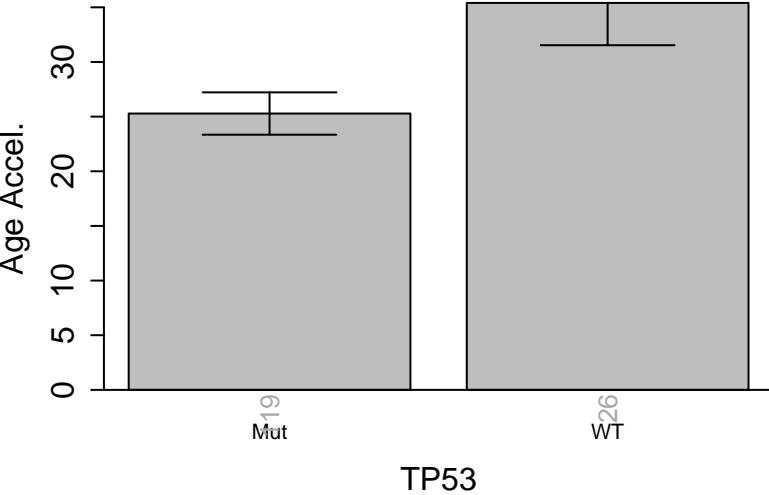

**J TCGA.READ450 TP53 p = 0.74**

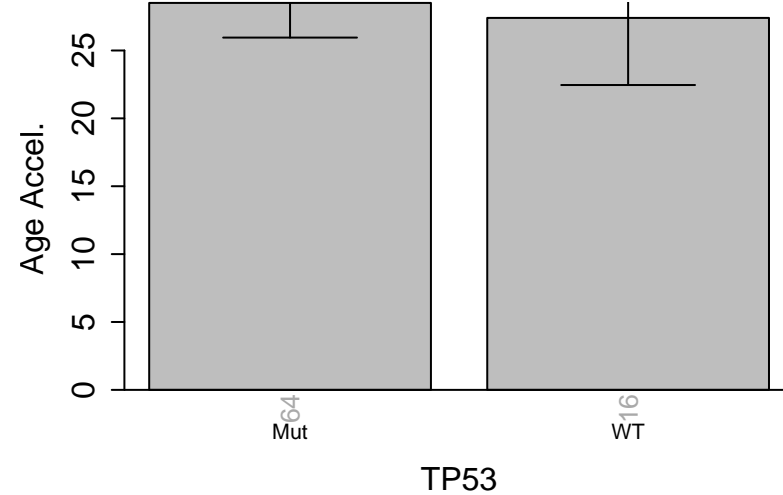

**K UterineCorpusEndometrioidUCEC.450.TCGA TP53 p = 0.92**

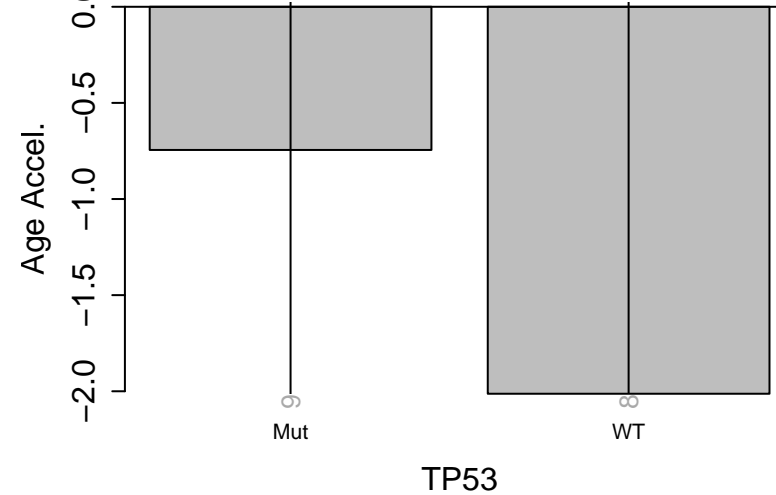

**L UterineCorpusEndometrioidUCEC.27.TCGA TP53 p = 0.0009**

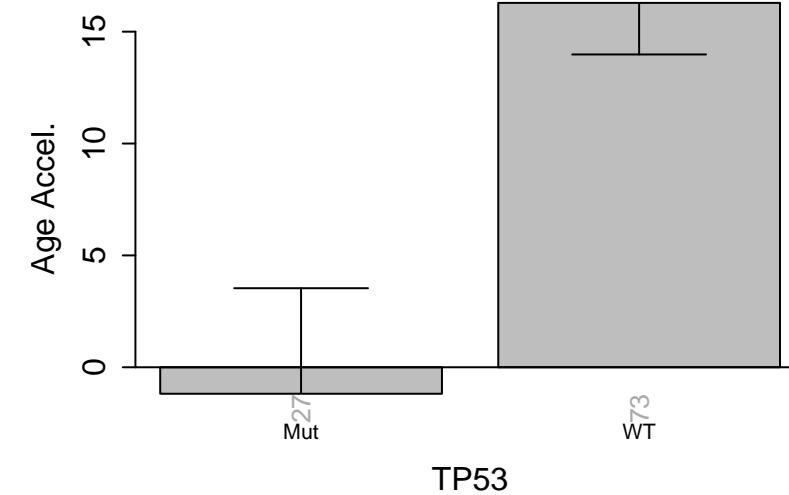

Supplement: gb-2013-14-10-r115-S17.pdf [file gb-2013-14-10-r115-S17.pdf]
