# Supplementary material for: DNA methylation age of human tissues and cell types
Source: PubMed Central journal article supplement (PMC4015143; doi:10.1186/gb-2013-14-10-r115), 2013-10-21

**A DNAmAge vs cell line**

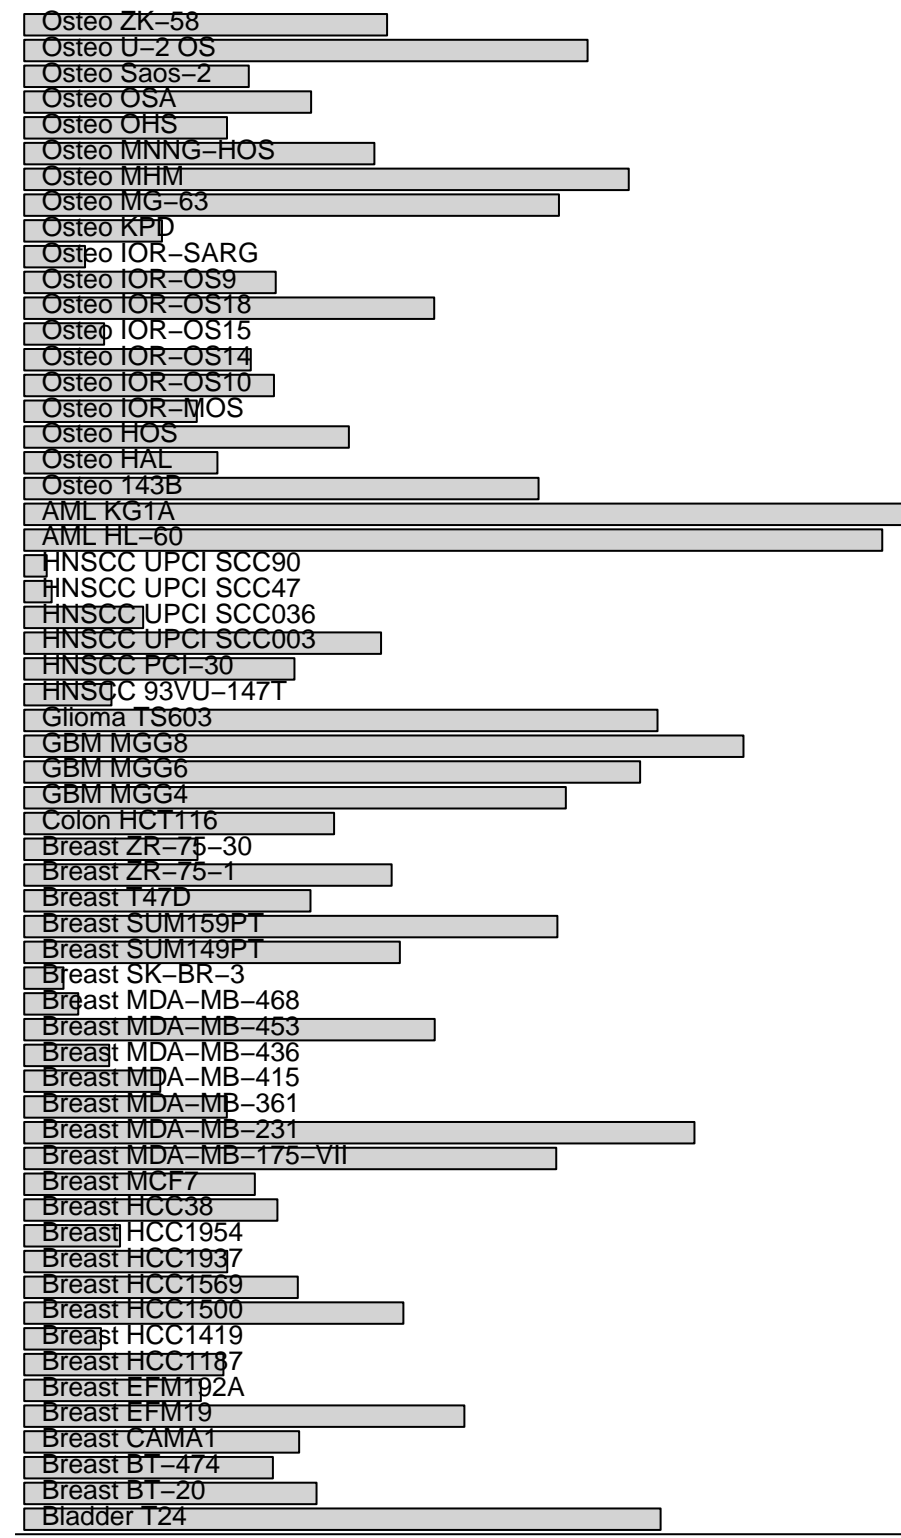

**B Breast Cancer Cell Lines err=19 cor=0.15, p=0.47**

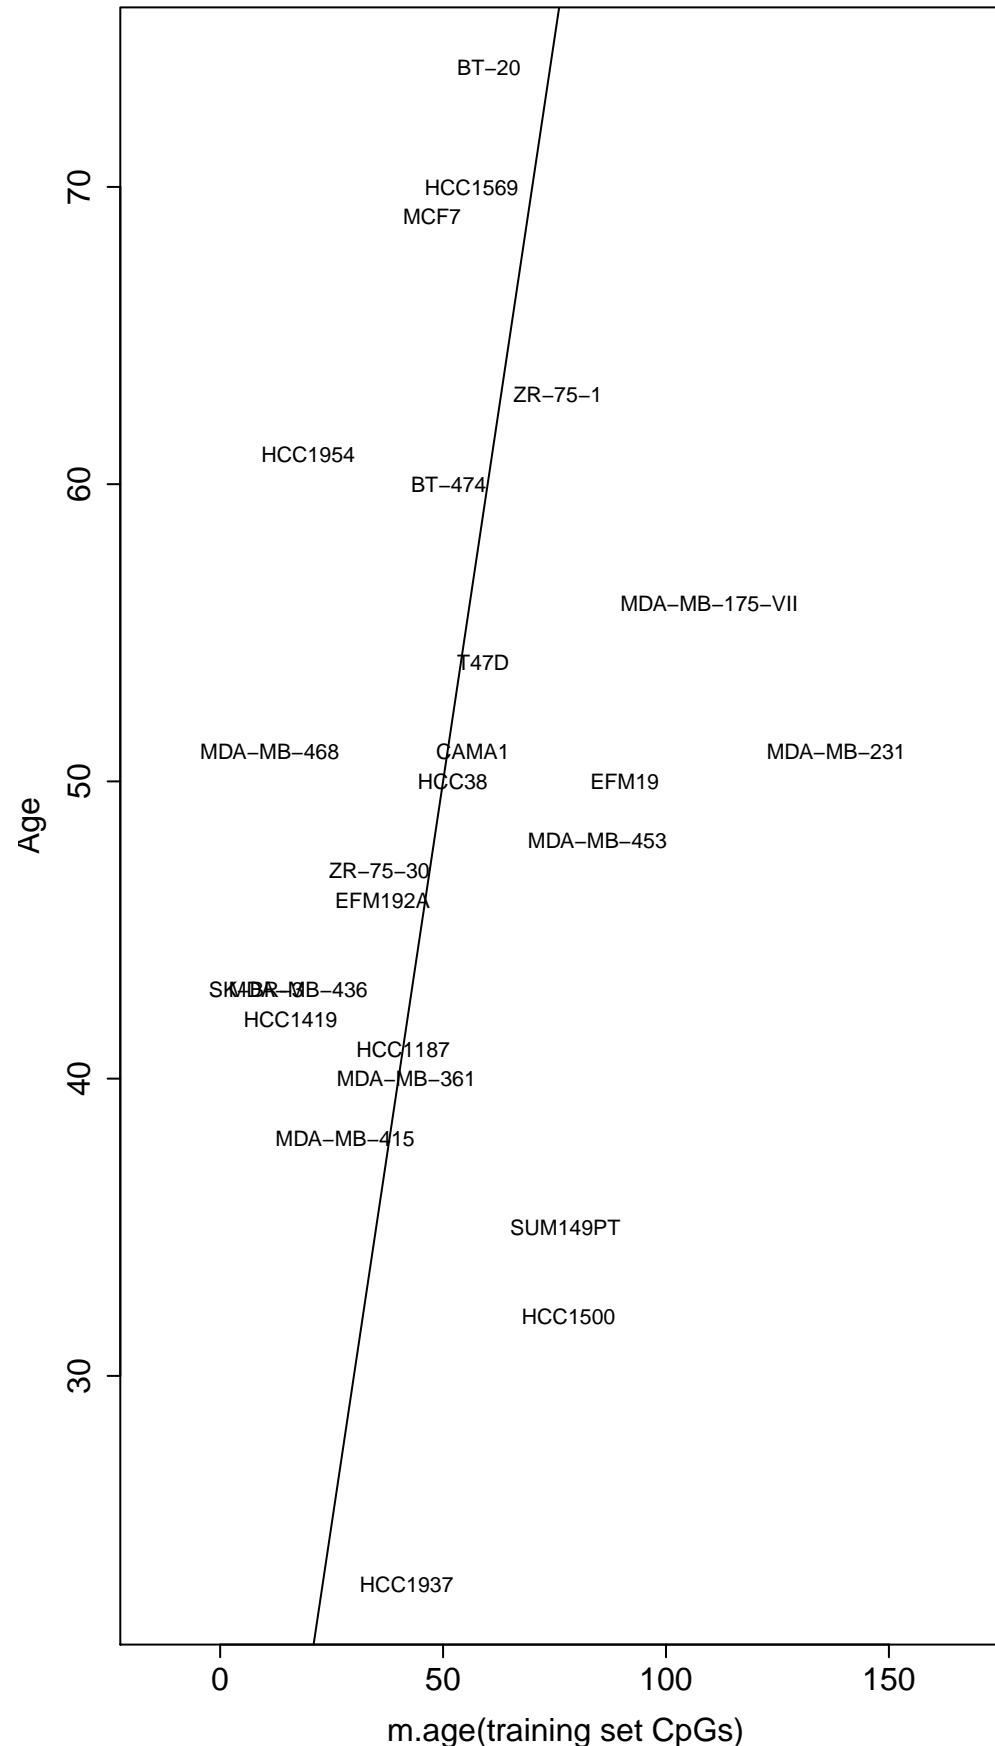

**C Osteo Cancer Cell Lines err=40 cor=0.41, p=0.081**

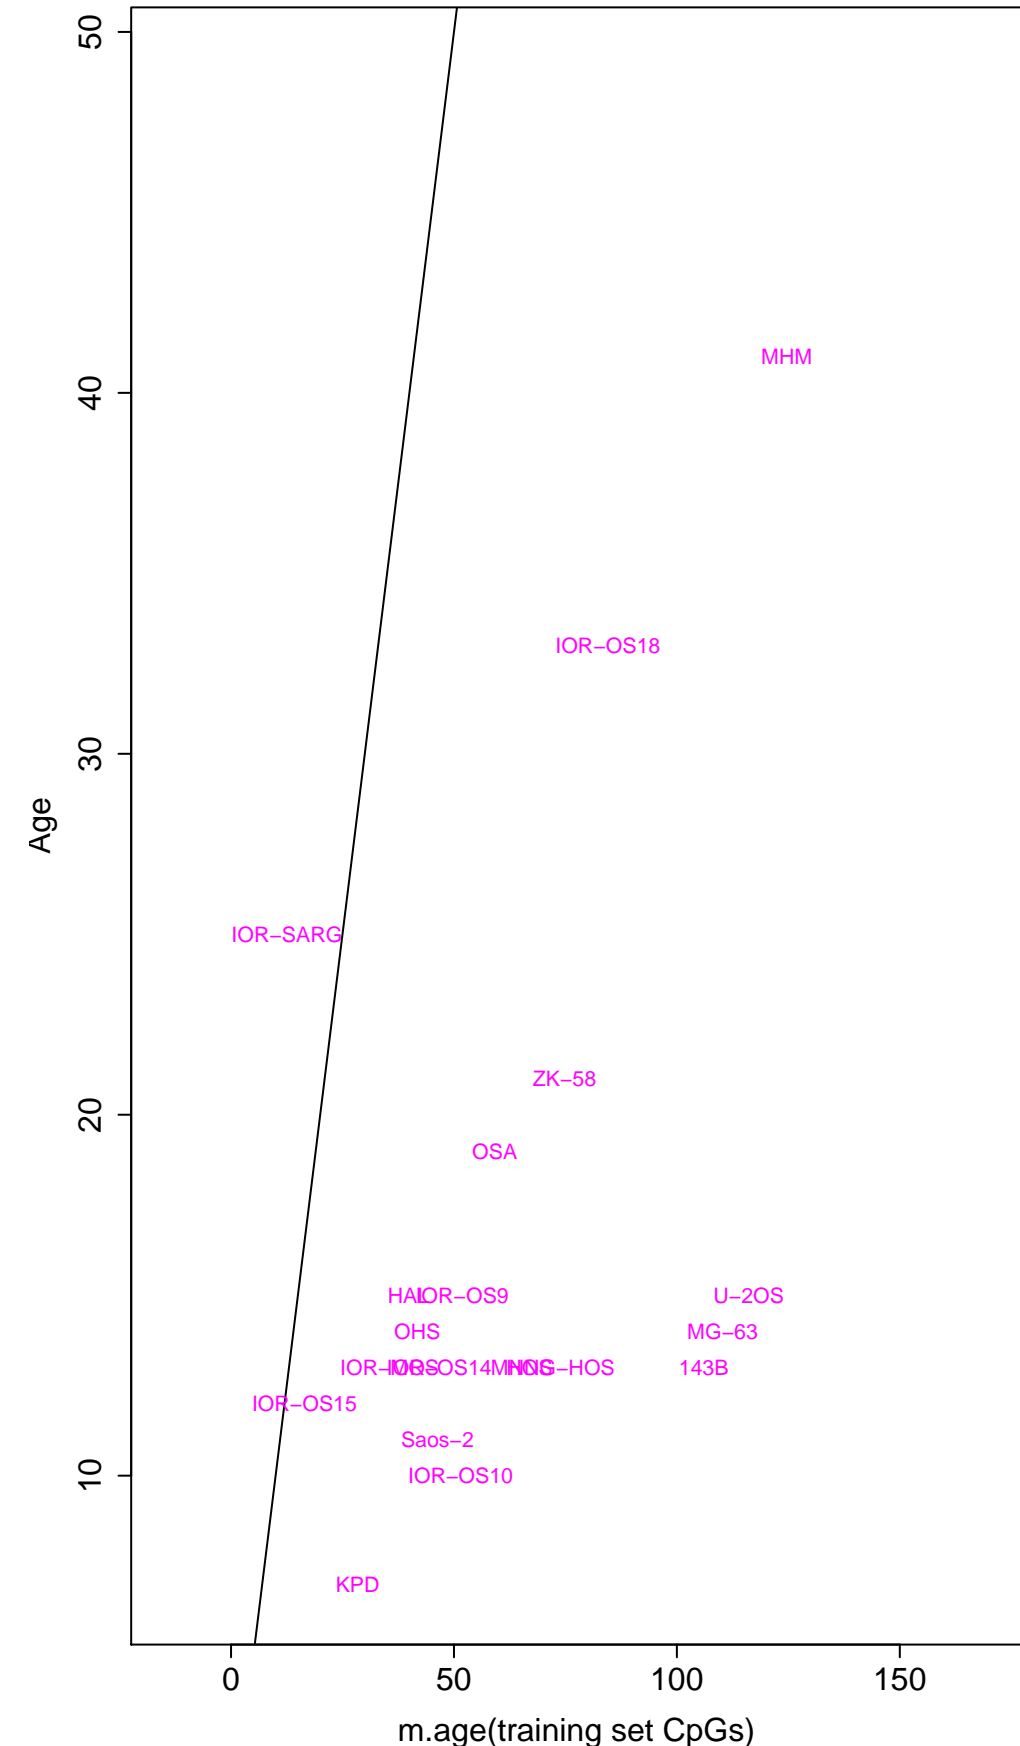

Supplement: gb-2013-14-10-r115-S18.pdf [file gb-2013-14-10-r115-S18.pdf]
